# Supplementary material for: Halogenated non-innocent vanadium(v) Schiff base complexes: chemical and anti-proliferative properties
Source: Royal Society of Chemistry journal article supplement (doi:10.1039/d4nj01223b), 2024-01-01
Supplement: d4nj01223b1.pdf [file d4nj01223b1.pdf]

## Supplementary Information for

# Halogenated Non-Innocent Vanadium(V) Schiff base complexes: chemical and anti-proliferative properties

Allison Haase<sup>1</sup>, Skyler A. Markham<sup>1</sup>, Heide A. Murakami<sup>1</sup>, John Hagan<sup>1</sup>,  
Kateryna Kostenkova<sup>1</sup>, Jordan T. Koehn<sup>1</sup>, Canan Uslan<sup>2</sup>, Cheryle Beuning<sup>1</sup>,  
Lee Brandenburg<sup>1</sup>, Joseph M. Zadronzny<sup>1</sup>, Aviva Levina<sup>2</sup>, Peter A. Lay<sup>\*2</sup>,  
Debbie C. Crans<sup>\*1,3</sup>

<sup>1</sup>Chemistry Department, Colorado State University, Fort Collins, Colorado 80523, USA. E-mail: debbie.crans@colostate.edu

<sup>2</sup>Cell and Molecular Biology Program, Colorado State University, Fort Collins, Colorado 80523, USA

<sup>3</sup>School of Chemistry, The University of Sydney, Sydney, NSW 2006, Australia <sup>4</sup>Sydney Analytical, The University of Sydney, Sydney, NSW 2006, Australia

E-mail (corresponding author): Debbie.crans@colostate.edu E-mail: peter.lay@sydney.edu.au

### Table of Contents

1. General Experimental Information
  - a. Schemes 1&2 Showing Synthesis of [VO<sub>2</sub>(Cl-Hshed)] and [VO<sub>2</sub>(Cl-Hshed)(R)]
  - b. Table(s) Showing Optimization of the Reaction
2. NMR Spectra
  - a. Full Proton Spectra of [VO(Cl-Hshed)(R)] in CD<sub>3</sub>CN and DMSO
  - b. Vanadium NMR Spectra of [VO(Cl-Hshed)(R)] in CD<sub>3</sub>CN and DMSO
  - c. Full Proton Spectra of [VO(Cl-Hshed)(4-tBu)] in CD<sub>3</sub>OD
  - d. Vanadium NMR Spectra of [VO(Cl-Hshed)(4-tBu)] in CD<sub>3</sub>OD
  - e. 2D NMR of [VO(Cl-Hshed)(4-tBu)] in DMSO
  - f. 2D NMR of [VO(Cl-Hshed)(4-tBu)] in CD<sub>3</sub>CN
3. Mass Spectra
  - a. High Resolution ESI Mass Spectrometry of [VO(Cl-Hshed) Compounds
4. Electrochemistry
  - a. Full Cyclic Voltammograms of [VO(Cl-Hshed)(R)] tested
  - b. Negative Range Cyclic Voltammograms of [VO(Cl-Hshed)(R)]
  - c. Positive Range Cyclic Voltammograms of [VO(Cl-Hshed)(R)]
  - d. Comparative Graphs of [VO(Cl-Hshed)(R)] Stability and half wave potentials
5. Biological Data of Vanadium Schiff Base Catecholates
  - a. Concentration Dependencies of Cell Viability
  - b. Time Dependent UV-Vis studies of [VO(Cl-Hshed)(R)] in Media

**6. Summary Of Chemicalize information**

- a. Computed Physical Properties of the Catechol Ligands**
- b. Computed physical properties of the complex where a nitrogen is coordinately bonded to the vanadium center.**
- c. Computed physical properties of the complex where a nitrogen is covalently bonded to the vanadium center, but a hydrogen was lost from the nitrogen.**
- d. Average computed physical properties of the vanadium complex using both coordinate and covalent bonding methods.**

## 1. General Experimental Information

### a. Schemes 1&2 Showing Synthesis of $[\text{VO}_2(\text{Cl-Hshed})]$ and $[\text{VO}_2(\text{Cl-Hshed})(\text{R})]$

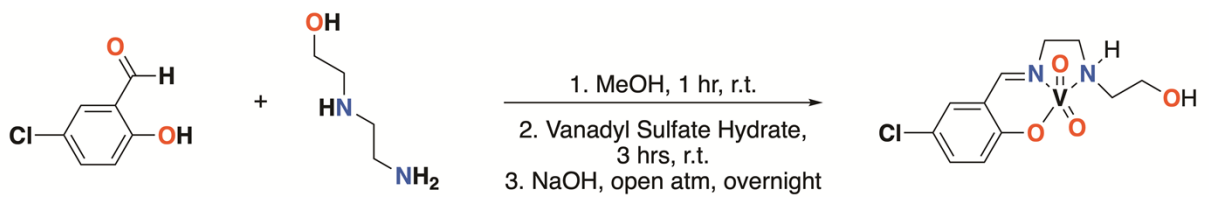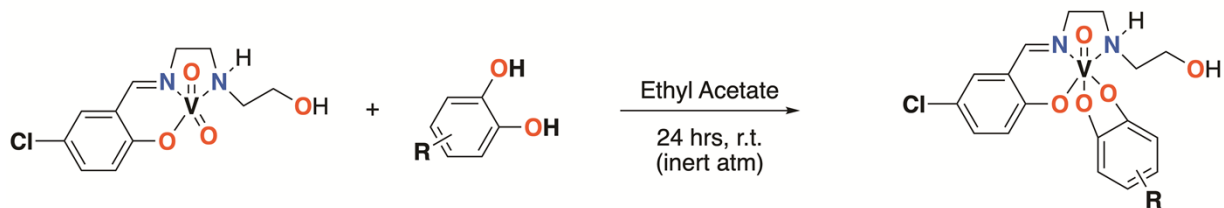

**b. Optimization Table of Reaction Conditions**

| Number | mmol cat. | mmol<br>V Precursor | Temp (°C) | Time (hrs.) | Yield |
|--------|-----------|---------------------|-----------|-------------|-------|
| 1      | 1         | 1                   | rt        | 3           | 55%   |
| 2      | 1         | 1                   | 30        | 6           | 52%   |
| 3      | 1         | 1                   | rt        | 24          | 60%   |
| 4      | 1         | 1                   | 30        | 24          | 50%   |
| 5      | 1         | 1                   | 0         | 24          | 45%   |
| 6      | 1         | 1                   | -78       | 24          | 14.8% |
| 7      | 1         | 1                   | rt        | 24          | 53%   |
| 8      | 1         | 1                   | rt        | 48          | 28%   |
| 9      | 1         | 1.2                 | rt        | 24          | 50%   |
| 10     | 1.2       | 1                   | rt        | 24          | 17%   |
| 11     | 1.5       | 1                   | rt        | 24          | 2%    |

**Table SI 1.b.** Optimization of Reaction Conditions on [VO(Cl-Hshed)(dtb)] before solvent optimization. Optimized conditions were then tested on all other compounds and shown to be best conditions.

**c. Optimization Table of Reaction Conditions**

| Number | Solvent           | Time (hrs.) | Yield |
|--------|-------------------|-------------|-------|
| 1      | Acetone           | 24          | 70%   |
| 2      | DCM               | 24          | 68%   |
| 3      | EtOAc             | 24          | 90%   |
| 4      | DMP               | 24          | 0%    |
| 5      | DME               | 24          | 25%   |
| 6      | Et <sub>2</sub> O | 24          | 30%   |
| 7      | DMF               | 24          | 61%   |
| 8      | DMSO              | 24          | 0%    |
| 9      | EtOH              | 24          | 0%    |
| 10     | MeOH              | 24          | 69%   |
| 11     | MeCN              | 24          | 35%   |

**Table SI 1.c.** Optimization of Solvent of Reaction on [VO(Cl-Hshed)(dtb)]. Optimized conditions were then tested on all other compounds and shown to be best conditions.

## 2. NMR Spectra

### a. Full Proton Spectra of $[\text{VO}(\text{Cl-Hshed})(\text{R})]$ in $\text{CD}_3\text{CN}$ and $\text{DMSO}$

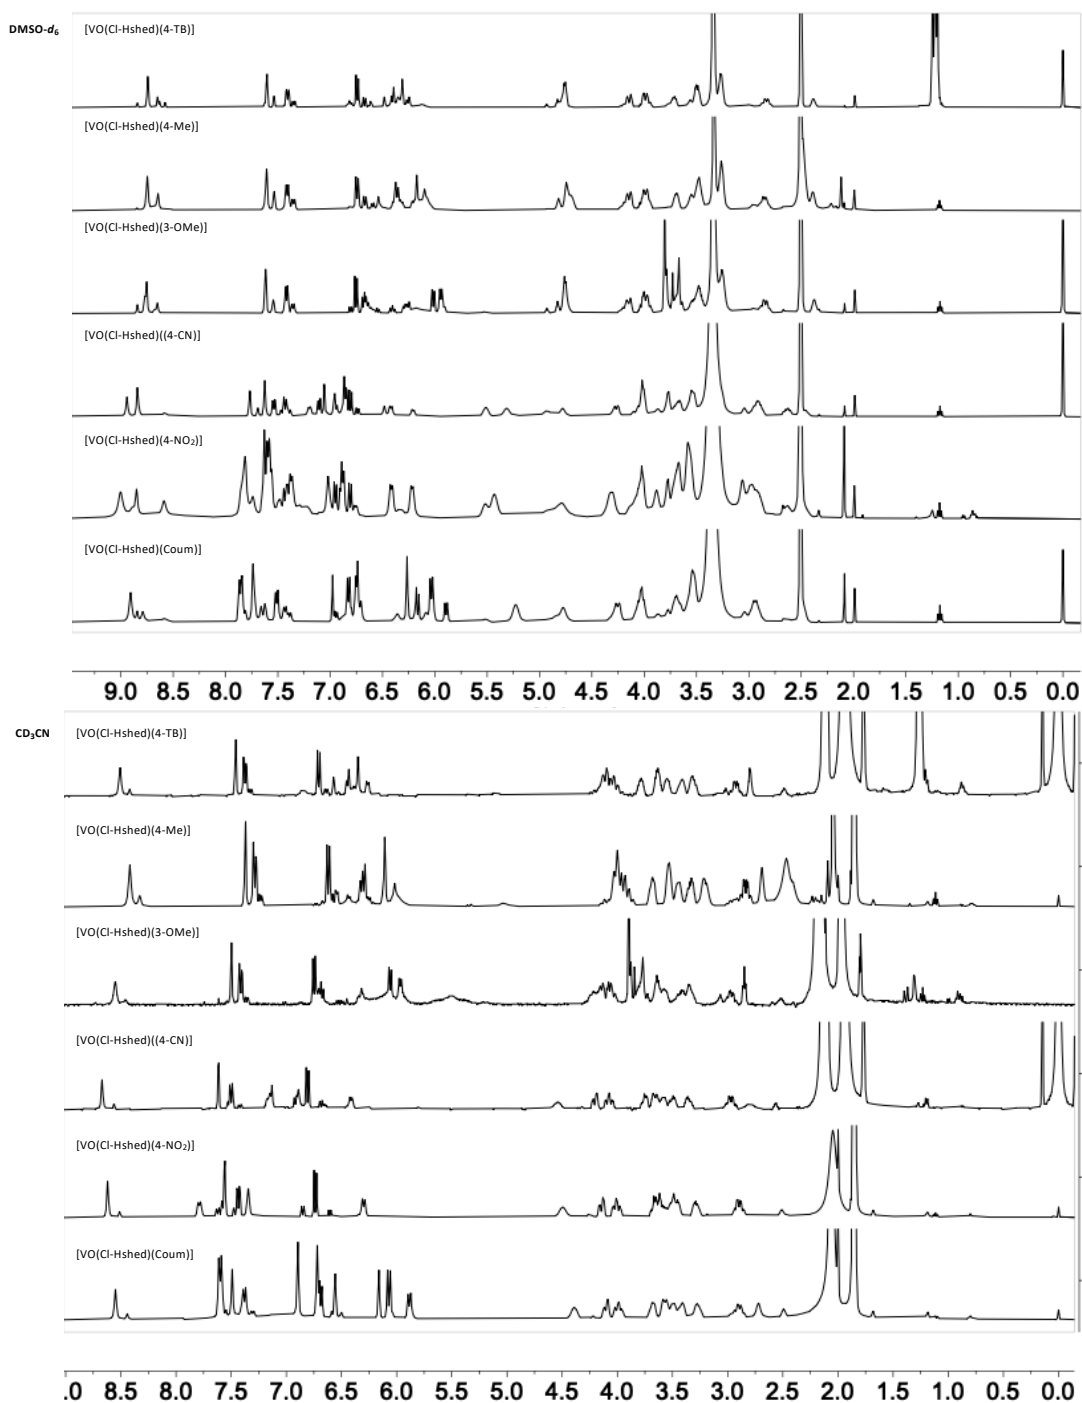

**Figure SI 2.a.**  $^1\text{H}$  NMR (400MHz) of 10mM  $[\text{VO}(\text{Cl-Hshed})(\text{R})]$  complexes in  $\text{DMSO}$  (top) and  $\text{CD}_3\text{CN}$  (bottom) at 4 or 10mM. Compounds in 4mM concentration are  $[\text{VO}(\text{Cl-Hshed})(4\text{-tBu})]$ ,  $[\text{VO}(\text{Cl-Hshed})(4\text{-CN})]$ ,  $[\text{VO}(\text{Cl-Hshed})(4\text{-NO}_2)]$  and  $[\text{VO}(\text{Cl-Hshed})(\text{Coup})]$ .

## b. Vanadium NMR Spectra of [VO(Cl-Hshed)(R)] in CD<sub>3</sub>CN and DMSO

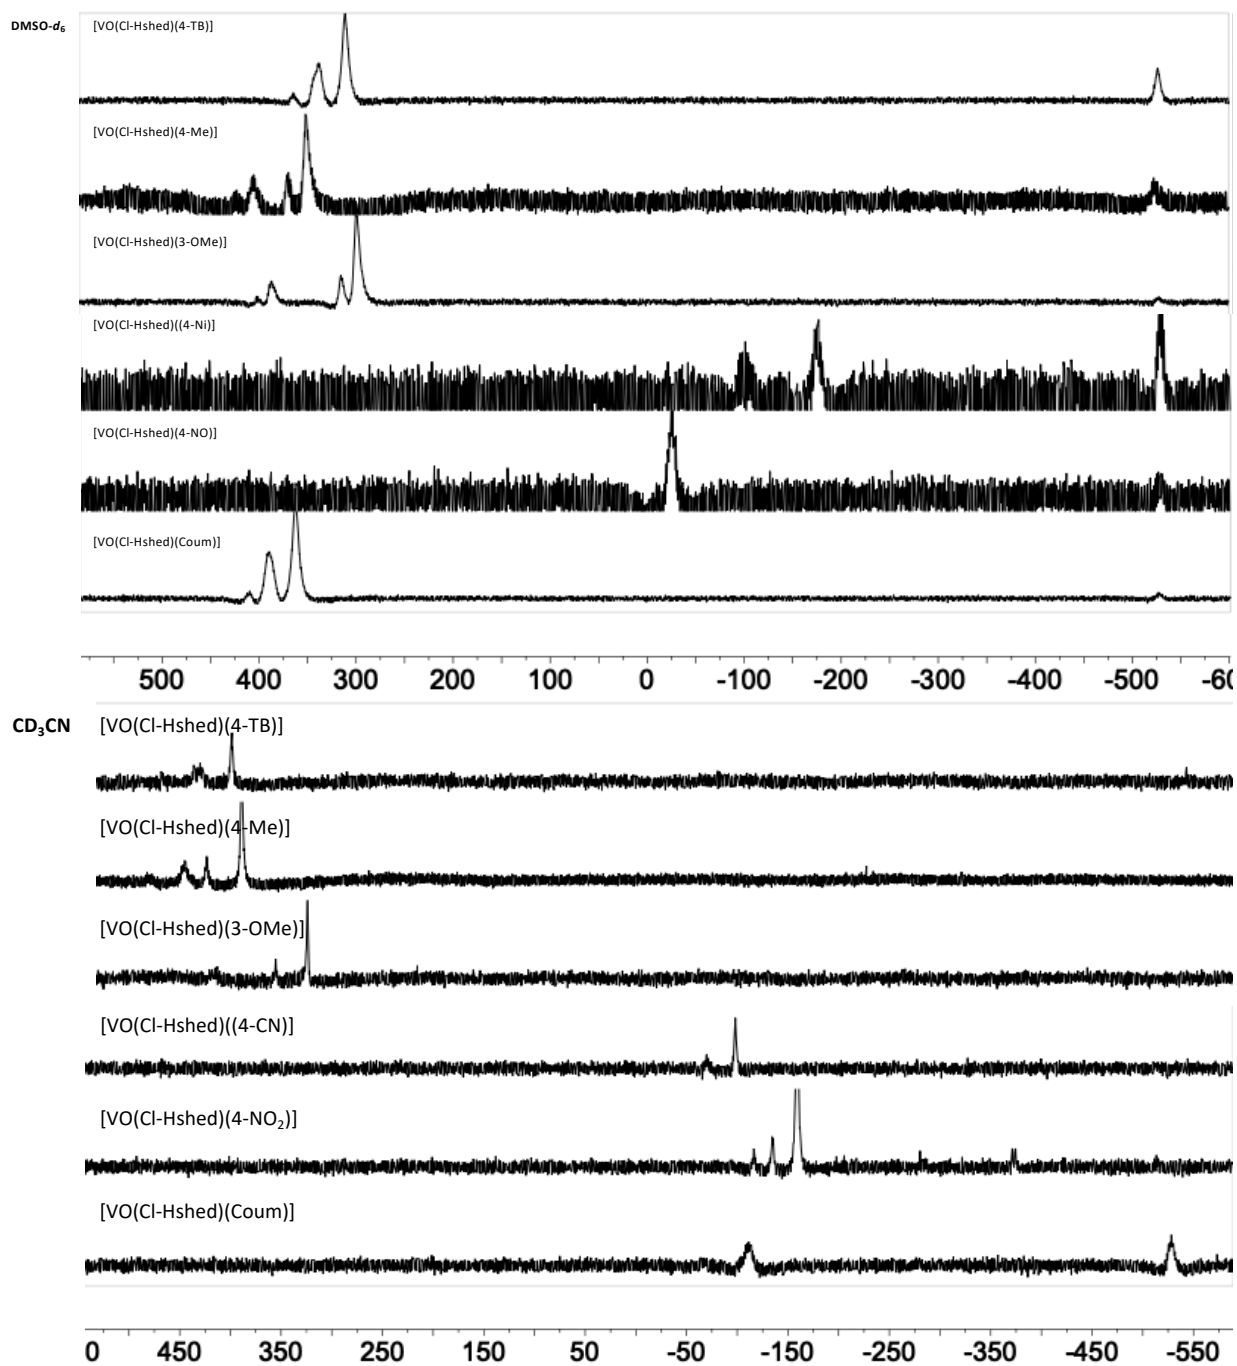

**Figure SI 2.b.** <sup>51</sup>V NMR (400MHz) of 10mM [VO(Cl-Hshed)(R)] complexes in DMSO (top) and CD<sub>3</sub>CN (bottom)

c. Full Proton Spectra of [VO(Cl-Hshed)(4-tBu)] in CD<sub>3</sub>OD

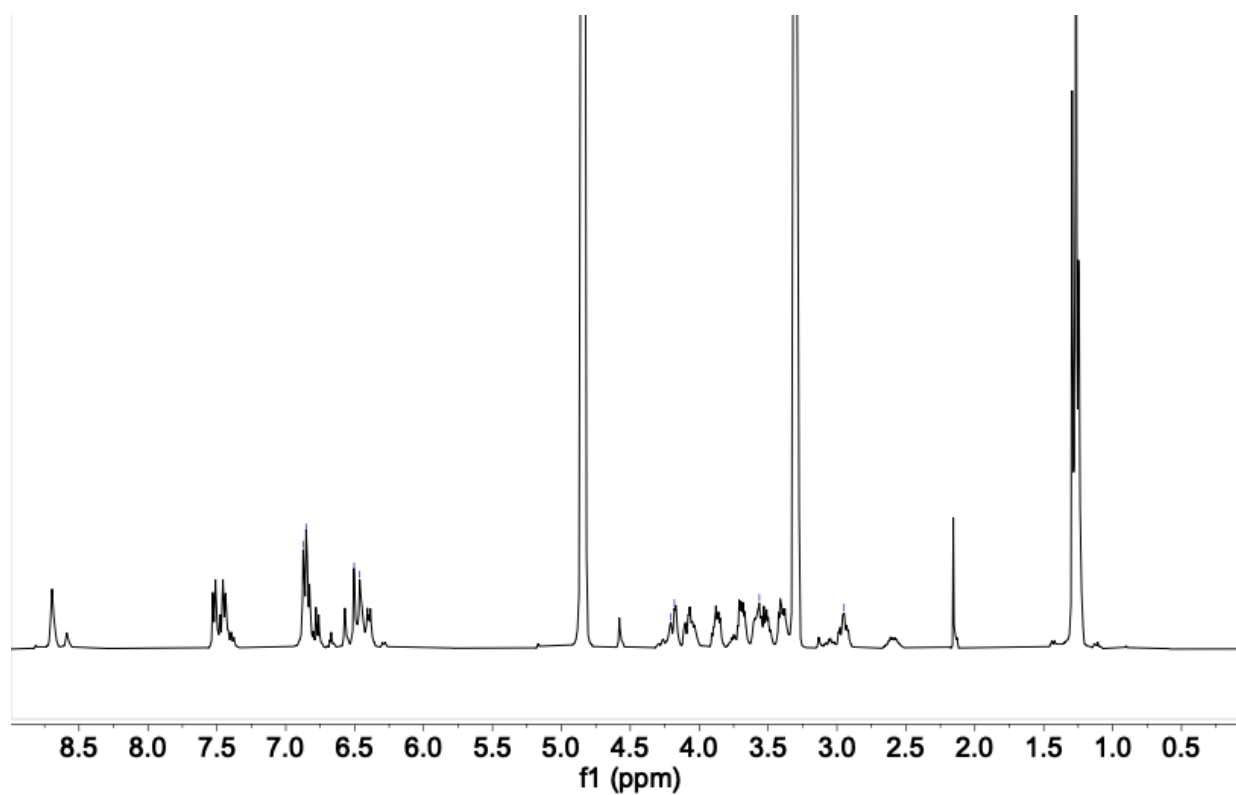

Figure SI 2.c. <sup>1</sup>H NMR (400MHz) of [VO(Cl-Hshed)(4-tBu)] in 10mM CD<sub>3</sub>OD



d. Vanadium NMR Spectra of [VO(Cl-Hshed)(4-tBu)] in CD<sub>3</sub>OD

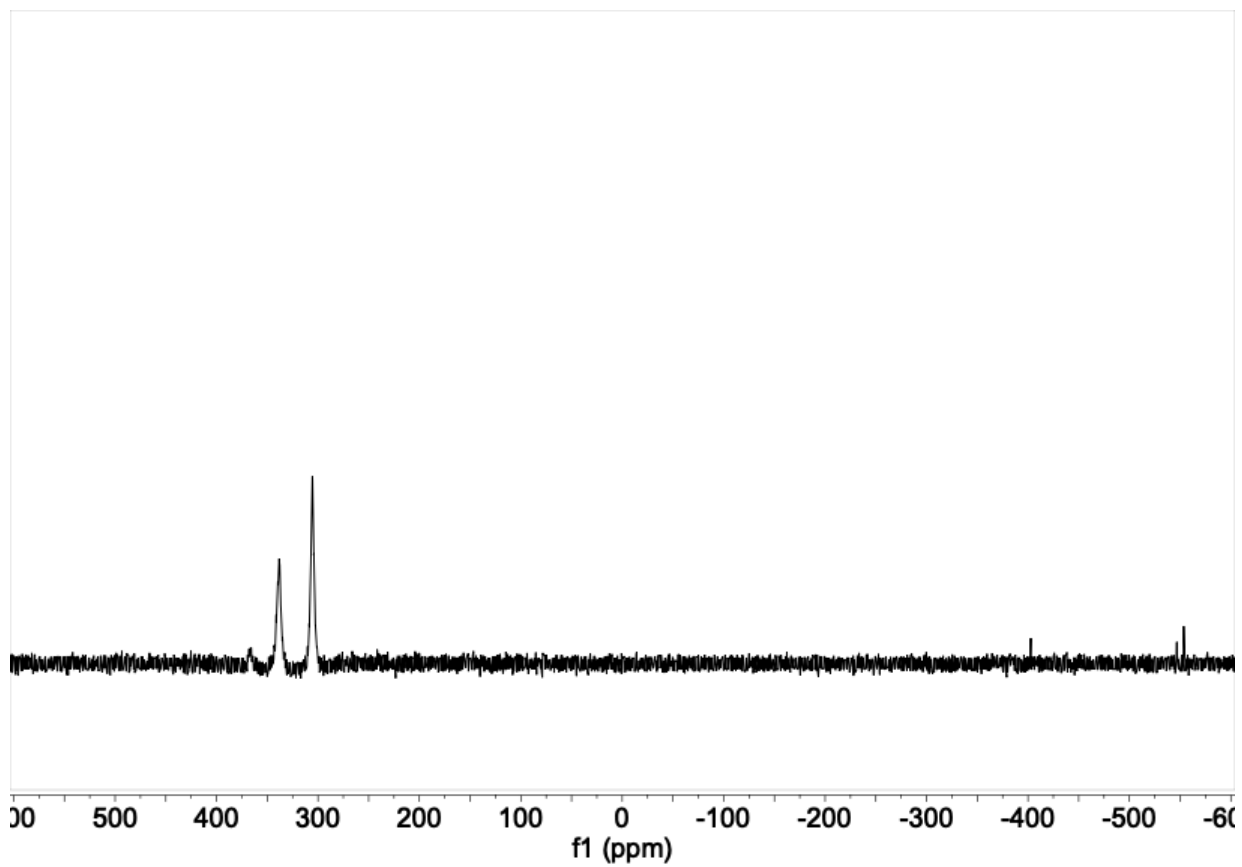

Figure SI 2.d. <sup>51</sup>V NMR (400MHz) of [VO(Cl-Hshed)(4-tBu)] in 10mM CD<sub>3</sub>OD

e. 2D NMR of [VO(Cl-Hshed)(4-tBu)] in DMSO

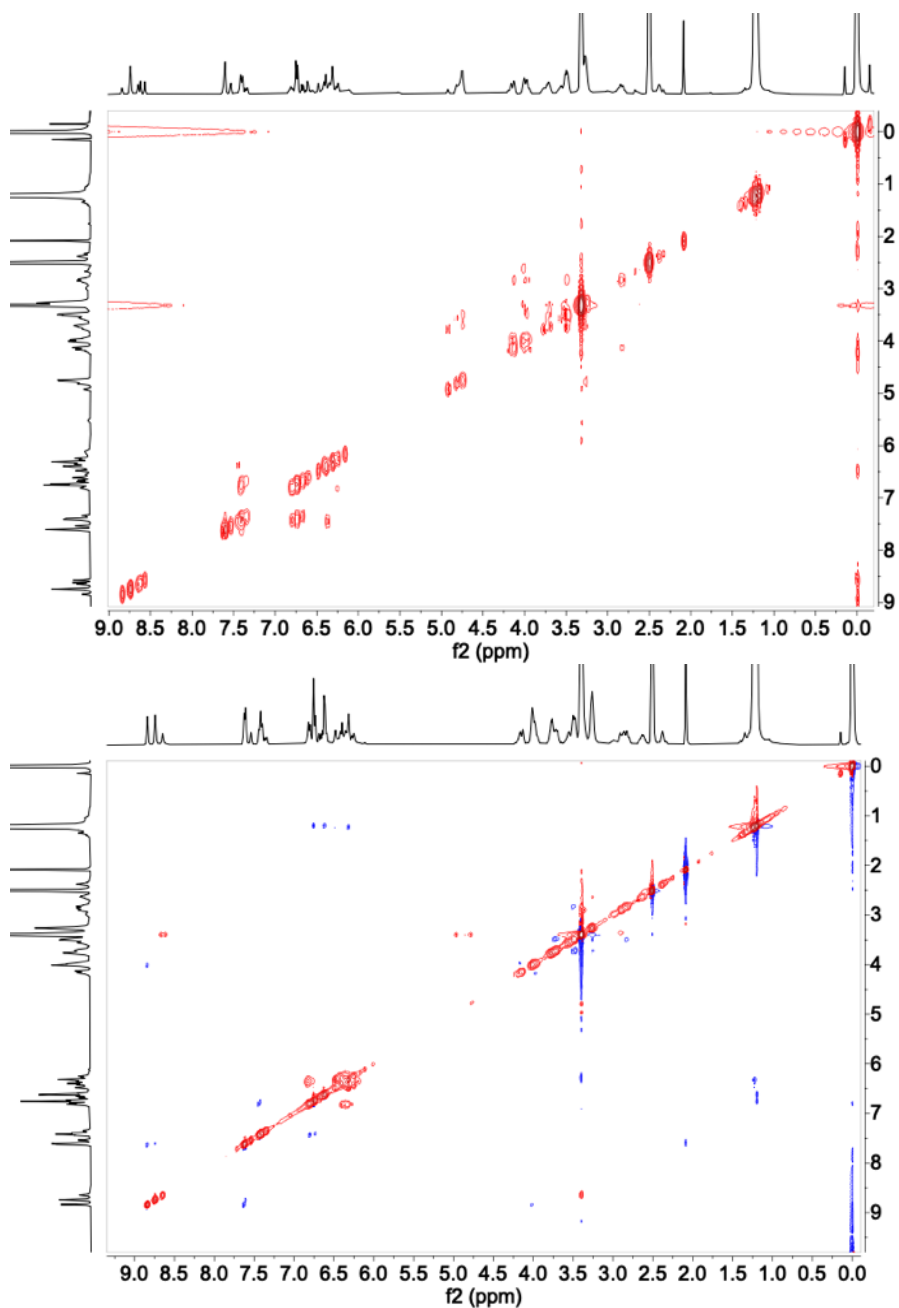

**Figure SI 2.e.**  $^1\text{H}$ - $^1\text{H}$  COSY and  $^1\text{H}$ - $^1\text{H}$  NOESY NMR (400MHz) spectra of 10mM [VO(Cl-Hshed)(4-tBu)] in DMSO. Full  $^1\text{H}$ - $^1\text{H}$  COSY (top) and full  $^1\text{H}$ - $^1\text{H}$  NOESY (bottom).

f. 2D NMR of [VO(Cl-Hshed)(4-tBu)] in CD<sub>3</sub>CN

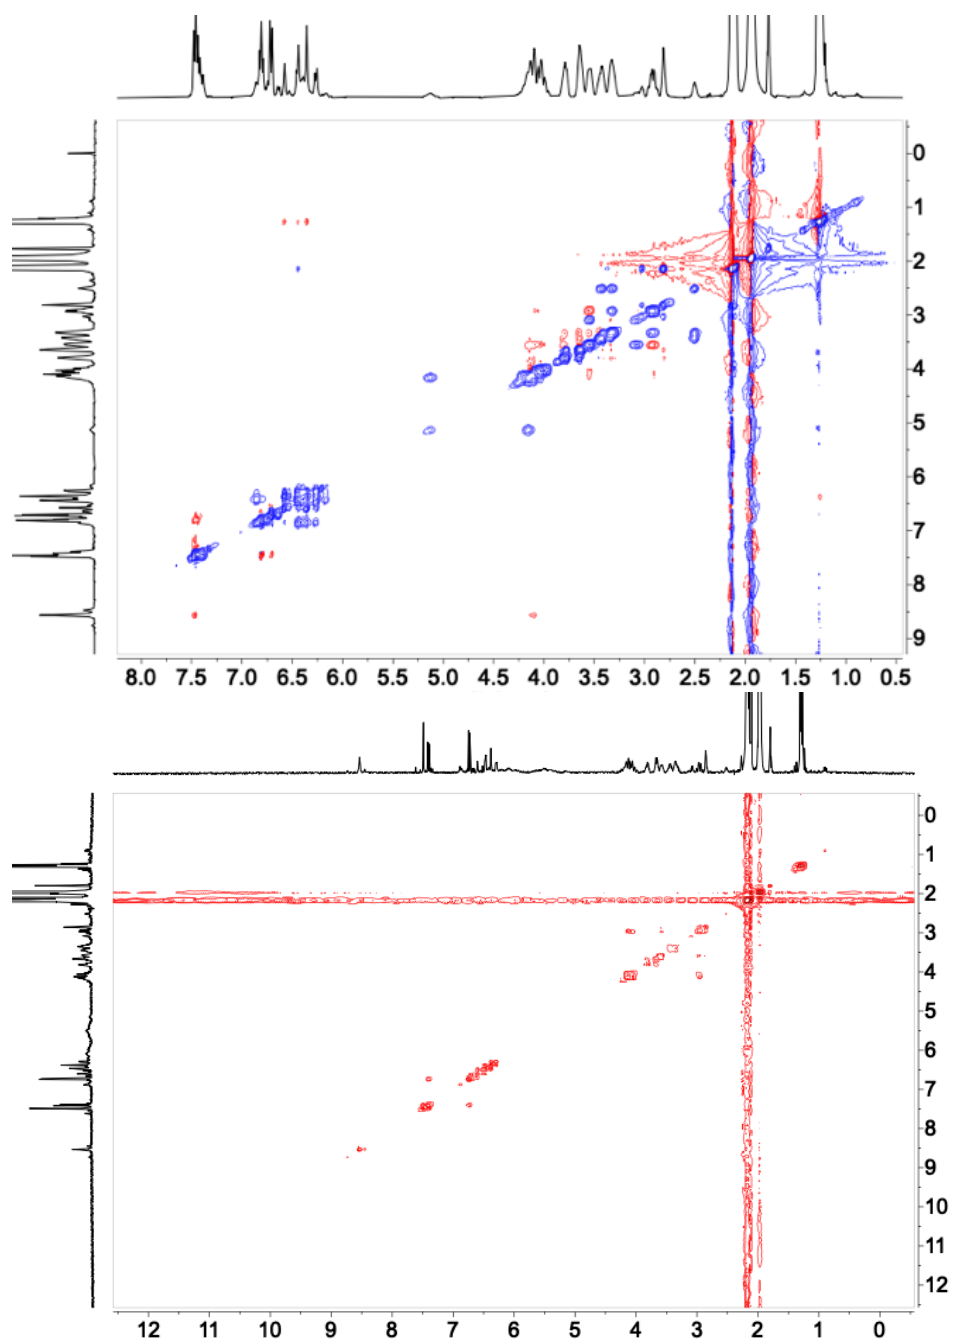

**Figure SI 2.f.** <sup>1</sup>H-<sup>1</sup>H COSY and <sup>1</sup>H-<sup>1</sup>H NOESY NMR (400MHz) spectra of 4mM [VO(Cl-Hshed)(4-tBu)] in CD<sub>3</sub>CN. Full <sup>1</sup>H-<sup>1</sup>H COSY (top) and full <sup>1</sup>H-<sup>1</sup>H NOESY (bottom).

### 3. Mass Spectra

#### a. High Resolution ESI Mass Spectrometry of [VO(Cl-Hshed) Compounds

20220207\_Service\_HiRes\_ESI\_00013  
MeCN

02/07/22 13:20:44

V85

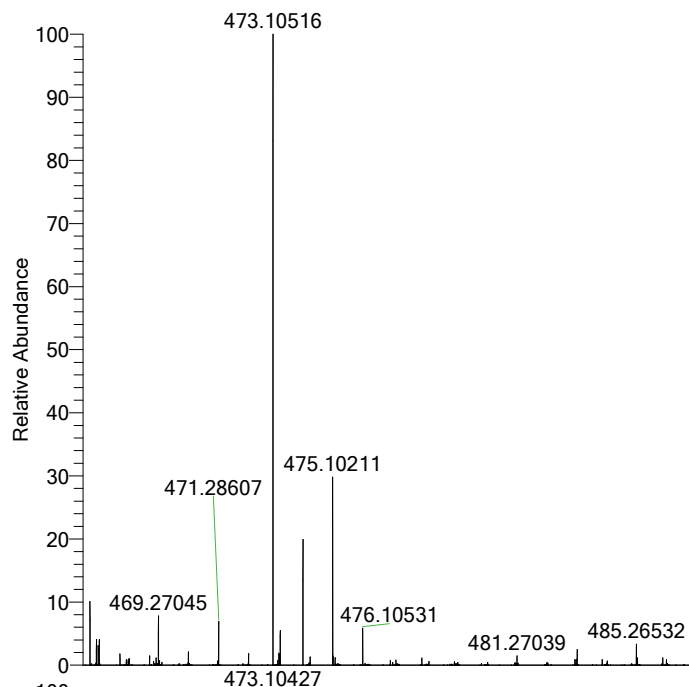

NL:  
1.36E7  
20220207\_Service\_HiRes\_ESI\_  
00013#2-55 RT: 0.02-0.51  
AV: 54 T: FTMS + p ESI Full  
ms [150.0000-1500.0000]

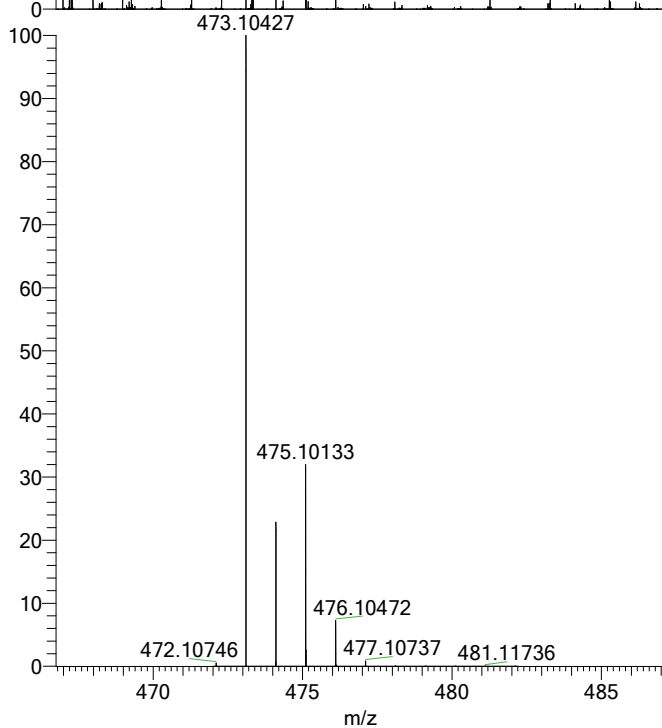

NL:  
6.91E4  
C<sub>21</sub> H<sub>26</sub> ClN<sub>2</sub> O<sub>5</sub> V +H:  
C<sub>21</sub> H<sub>27</sub> Cl<sub>1</sub> N<sub>2</sub> O<sub>5</sub> V<sub>1</sub>  
p (gss, s /p:8) Chrg 1  
R: 175000 Res .Pwr . @FWHM

Figure SI 3.a.1. Experimental (top) and theoretical (bottom) spectra of [VO(Cl-Hshed)(4-tBu)]

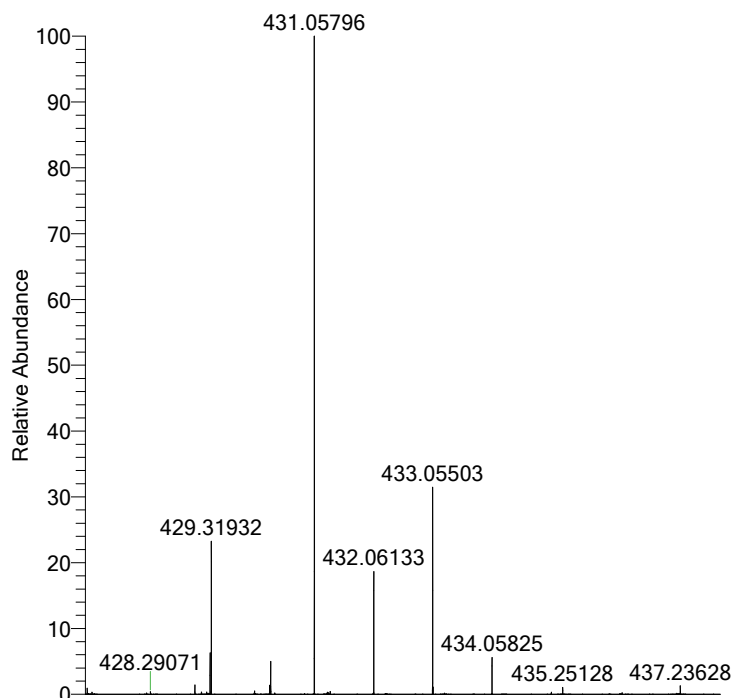

NL:  
6.11E6  
20220207\_Service\_HiRes\_ESI\_  
00014#1-53 RT: 0.01-0.50  
AV: 53 T: FTMS + p ESI Full  
ms [150.0000-1500.0000]

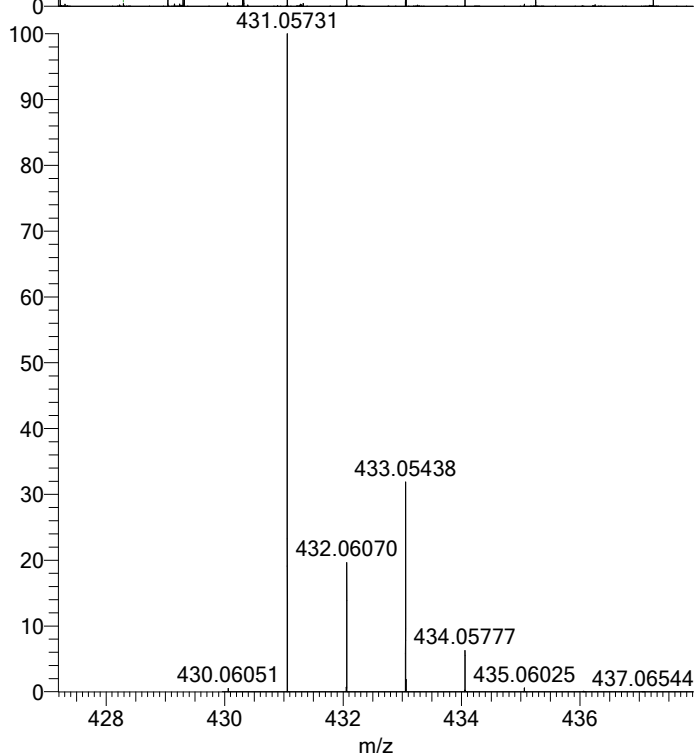

NL:  
7.14E4  
C<sub>18</sub> H<sub>20</sub> ClN<sub>2</sub> O<sub>5</sub> V +H:  
C<sub>18</sub> H<sub>21</sub> Cl<sub>1</sub> N<sub>2</sub> O<sub>5</sub> V<sub>1</sub>  
p (gss, s /p:8) Chrg 1  
R: 175000 Res .Pwr . @FWHM

Figure SI 3.a.2. Experimental (top) and theoretical (bottom) spectra of [VO(Cl-Hshed)(4-Me)]

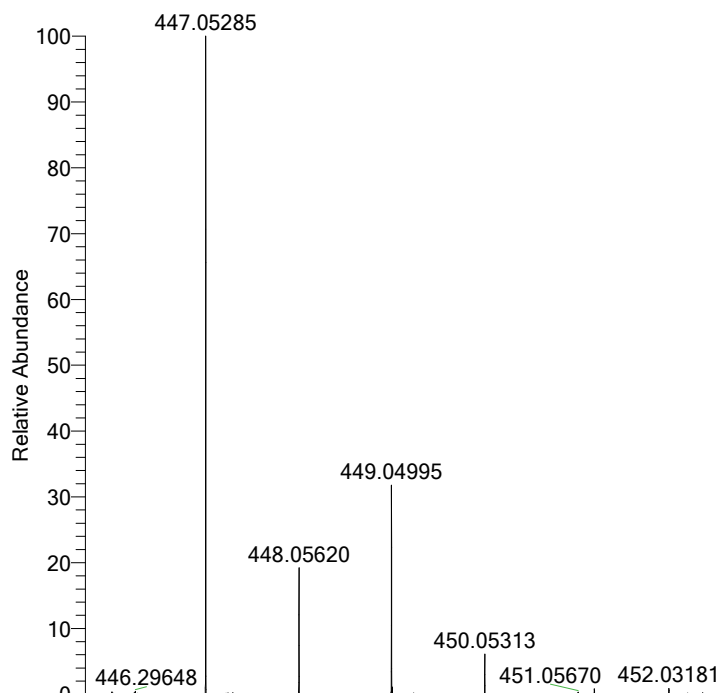

NL:  
1.13E7  
20220207\_Service\_HiRes\_ESI\_  
00009#1-39 RT: 0.01-0.37  
AV: 39 T: FTMS + p ESI Full  
ms [150.0000-1500.0000]

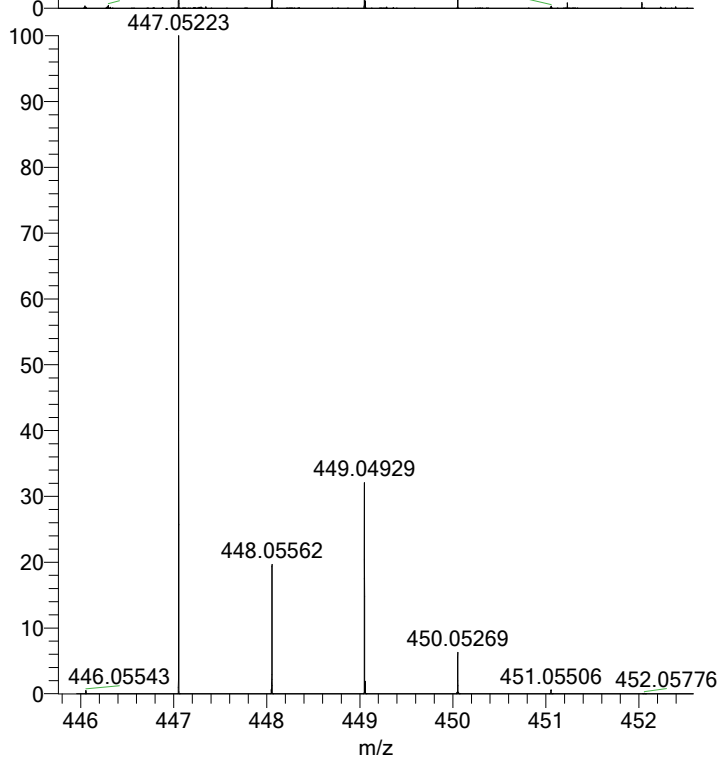

NL:  
7.09E4  
C<sub>18</sub> H<sub>20</sub> ClN<sub>2</sub> O<sub>6</sub> V +H:  
C<sub>18</sub> H<sub>21</sub> Cl<sub>1</sub> N<sub>2</sub> O<sub>6</sub> V<sub>1</sub>  
p (gss, s /p:8) Chrg 1  
R: 180000 Res .Pwr . @FWHM

Figure SI 3.a.3. Experimental (top) and theoretical (bottom) spectra of [VO(Cl-Hshed)(3-OMe)]

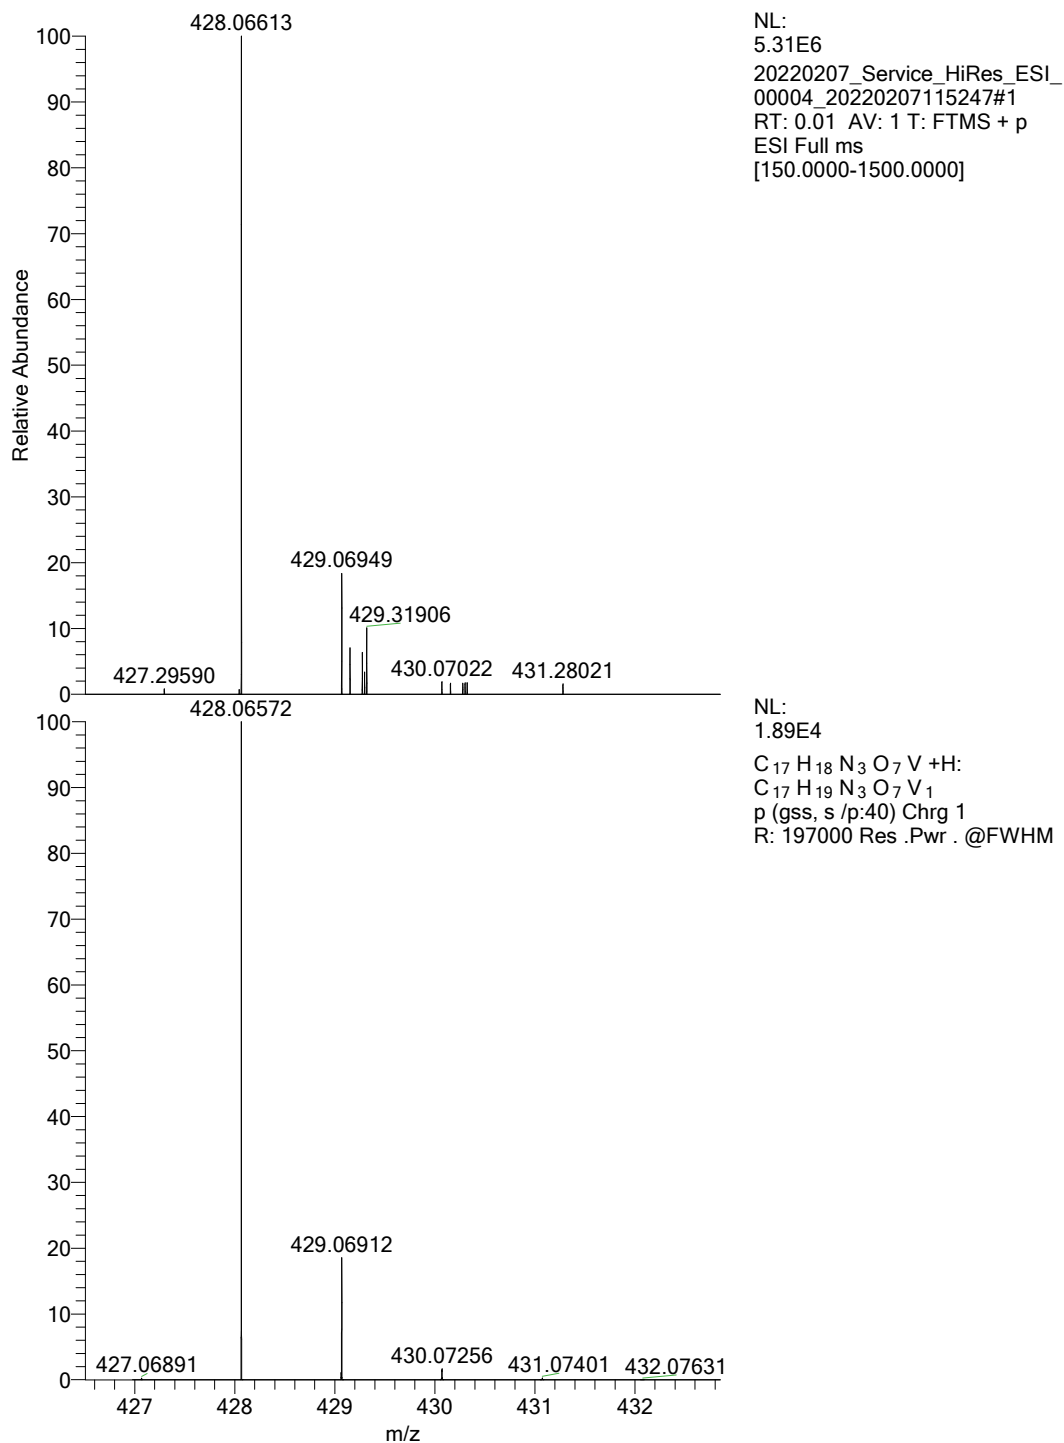

Figure SI 3.a.4. Experimental (top) and theoretical (bottom) spectra of [VO(Cl-Hshed)(4-NO<sub>2</sub>)]

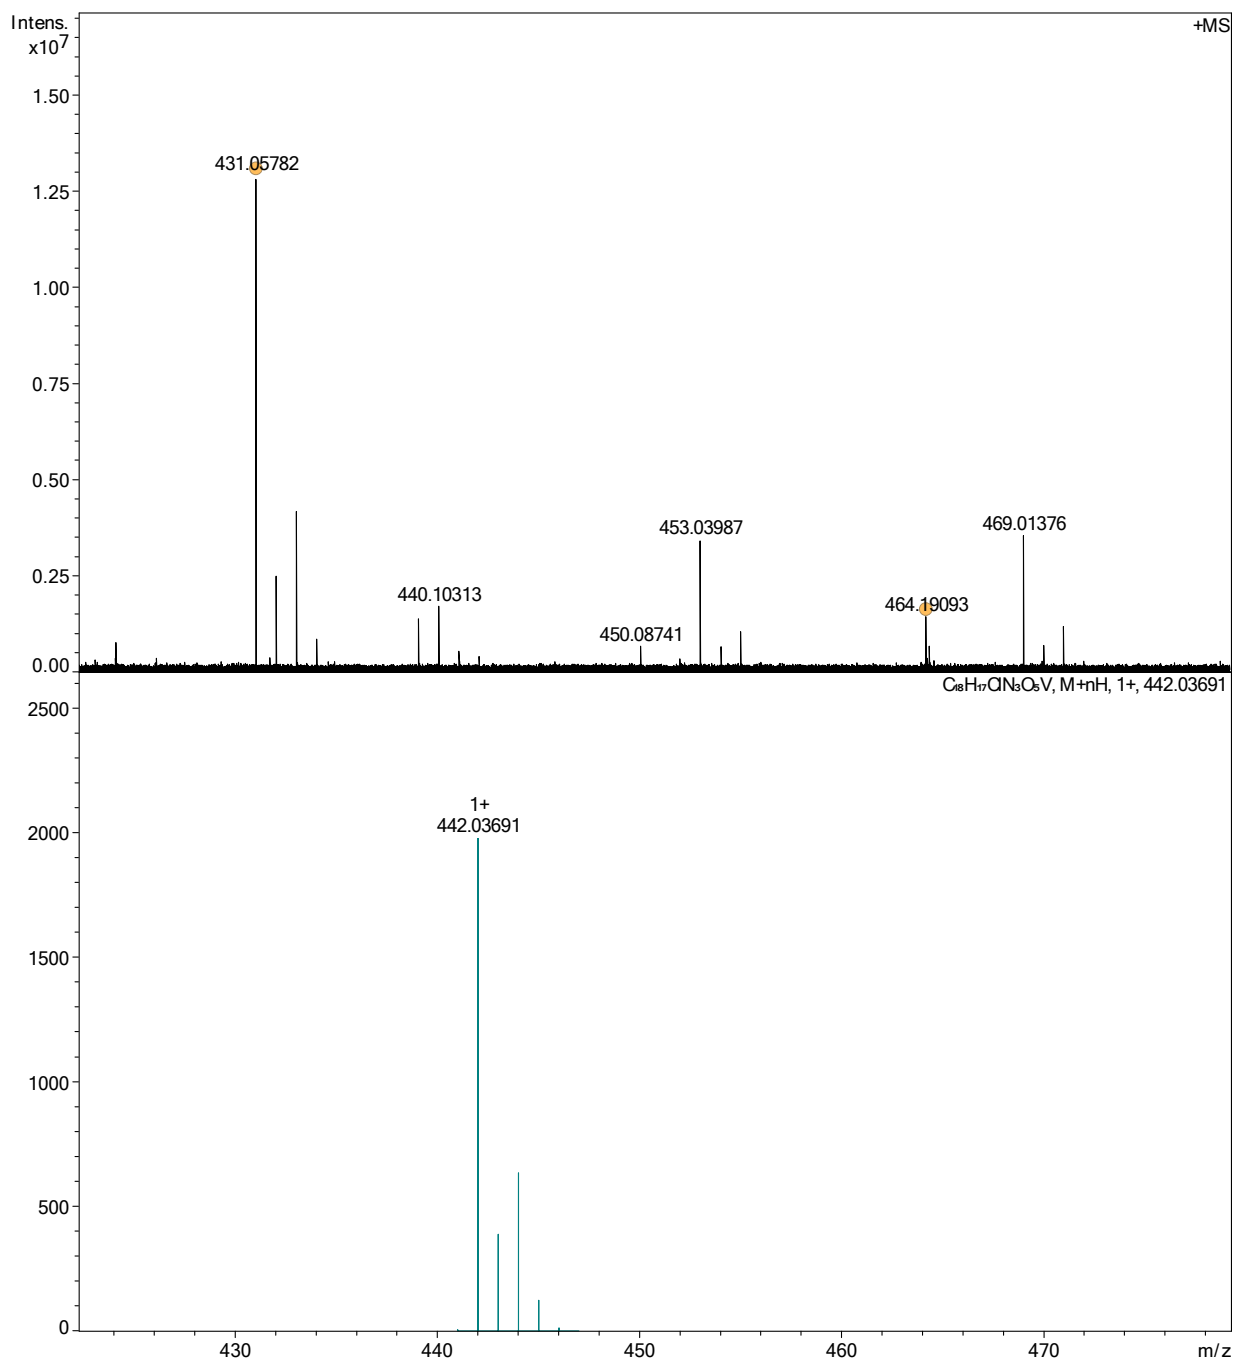

**Figure SI 3.a.5.** Experimental (top) and theoretical (bottom) spectra of [VO(Cl-Hshed)(4-CN)]



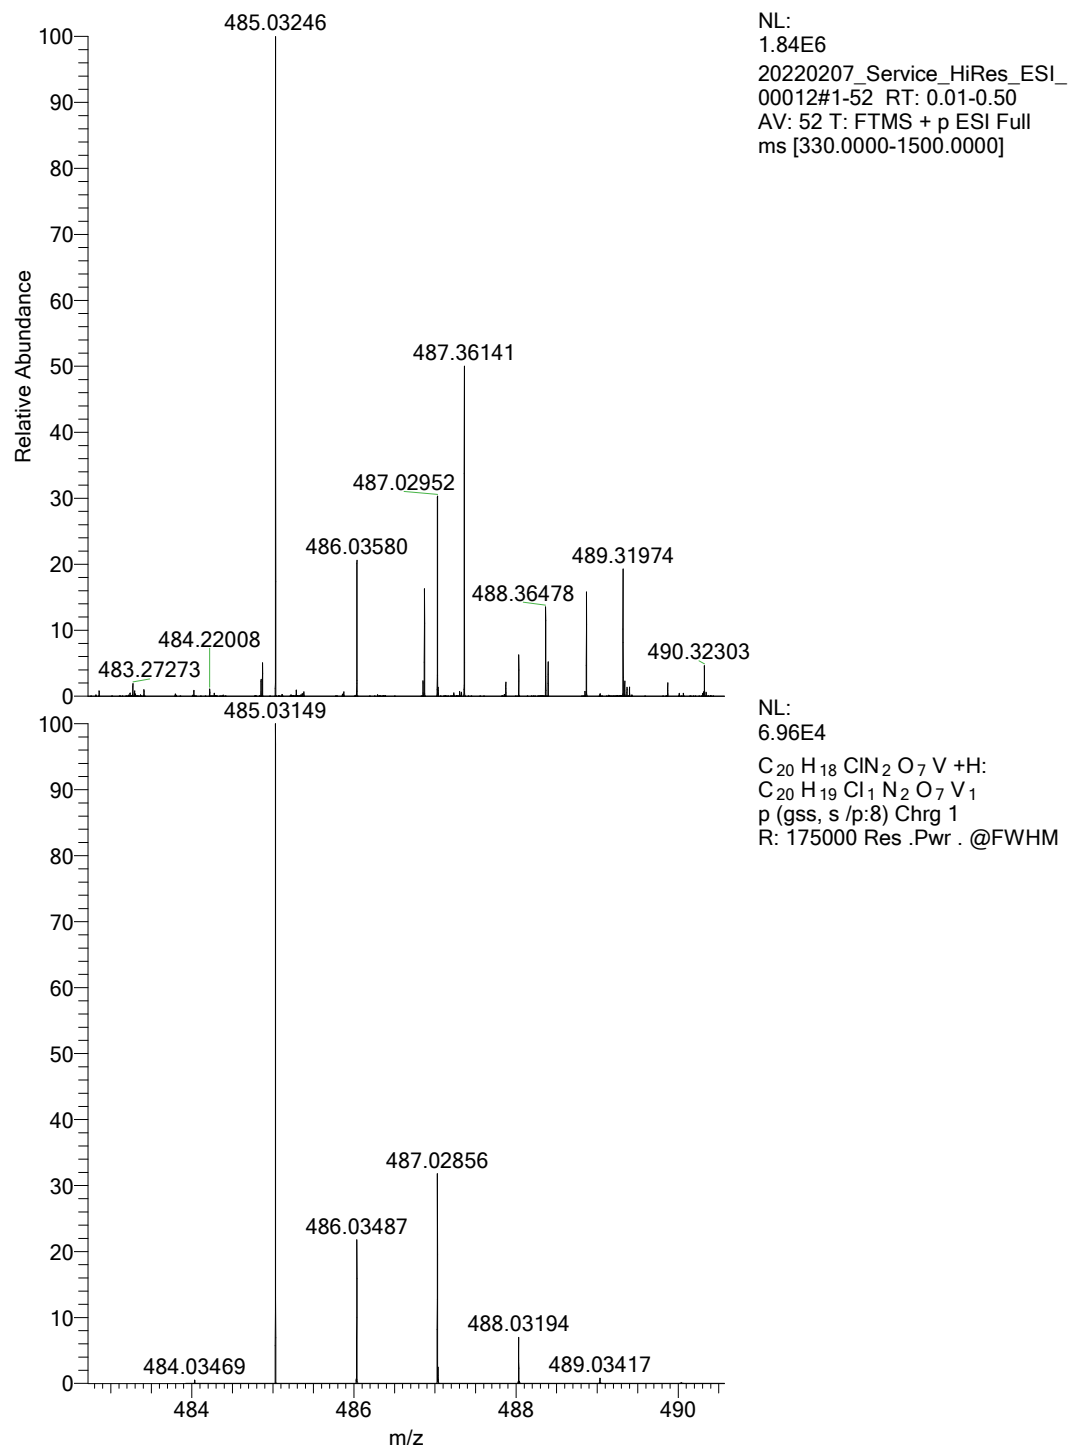

Figure SI 3.a.6. Experimental (top) and theoretical (bottom) spectra of [VO(Cl-Hshed)(coum)]

## 4. Electrochemistry

### a. Full Cyclic Voltammograms of [VO(Cl-Hshed)(R)] tested

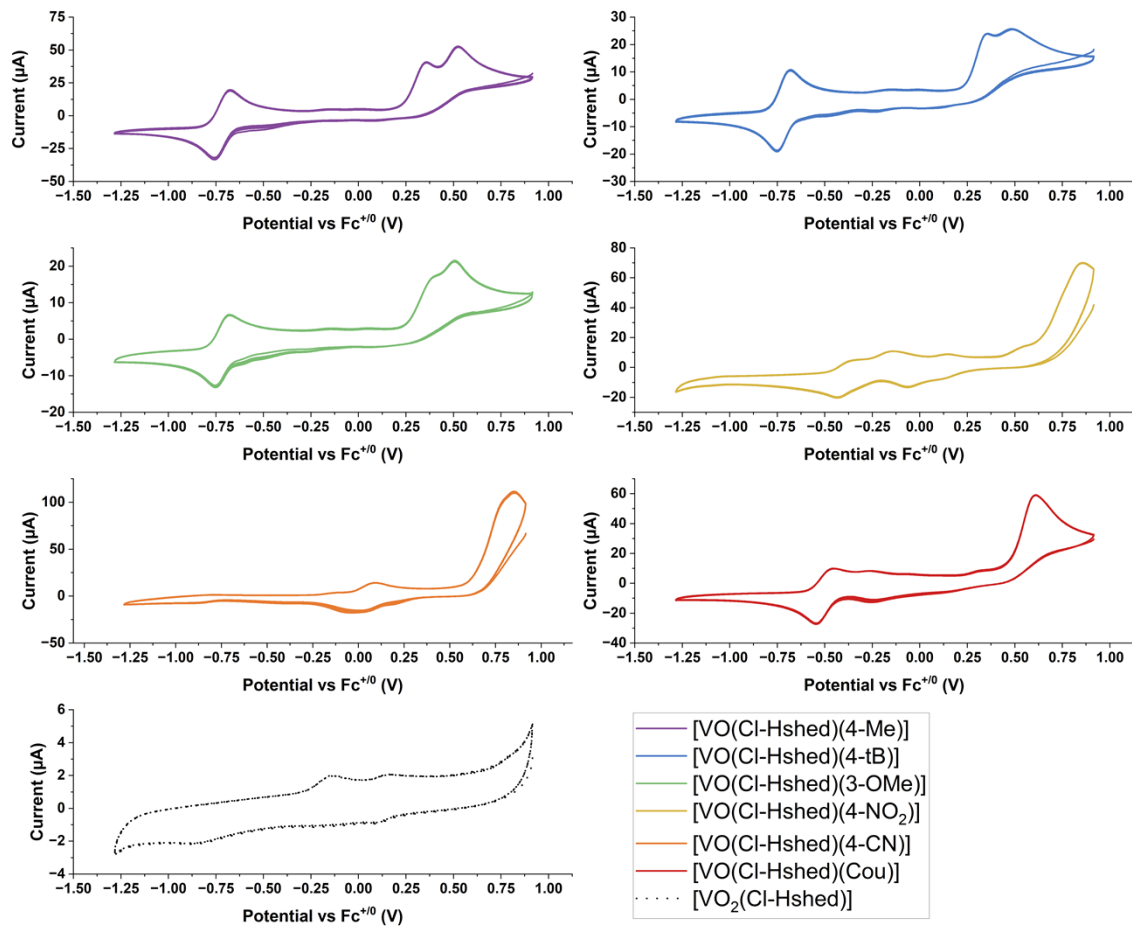

**Figure SI 4.a.1.** Cyclic voltammograms of tested compounds at 2 mM in CH<sub>3</sub>CN in the presence of 0.1 M TBAP as the supporting electrolyte. Scans were cycled at 100 mV s<sup>-1</sup> from approx. 1 V vs Fc<sup>+/0</sup> to -1.5 V and back 5 times using a glassy carbon working electrode. Figure includes the [VO<sub>2</sub>(Cl-Hshed)] precursor at 2mM.

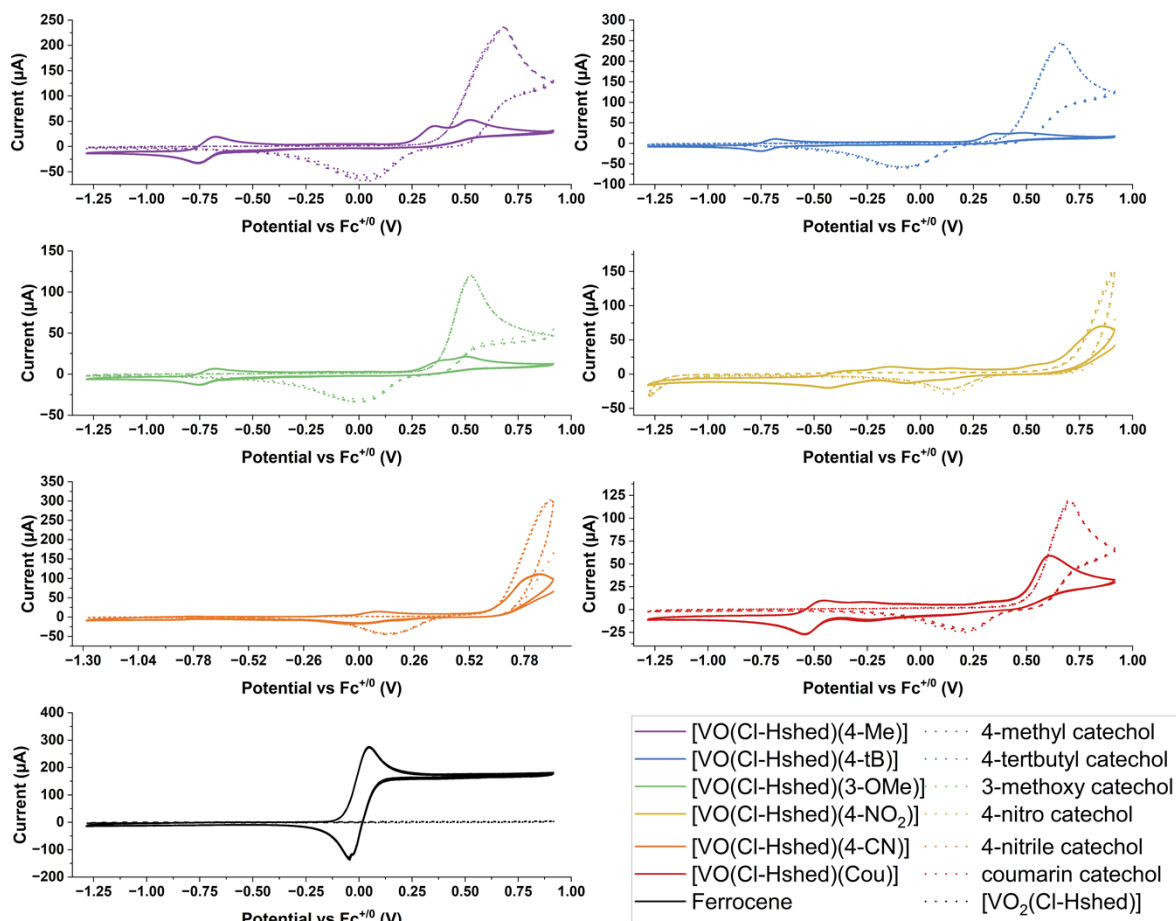

**Figure SI 4.a.2.** Cyclic voltammograms of tested compounds at 2 mM in  $\text{CH}_3\text{CN}$  in the presence of 0.1 M TBAP as the supporting electrolyte. Scans were cycled at  $100 \text{ mV s}^{-1}$  from approx. 1 V vs  $\text{Fc}^+/0$  to -1.5 V and back 5 times using a glassy carbon working electrode. Figure includes the  $[\text{VO}_2(\text{Cl-Hshed})]$  precursor and ferrocene at 2mM, while the free catechol ligands were tested at 5mM.

## b. Negative Cyclic Voltammograms of [VO(Cl-Hshed)(R)] tested

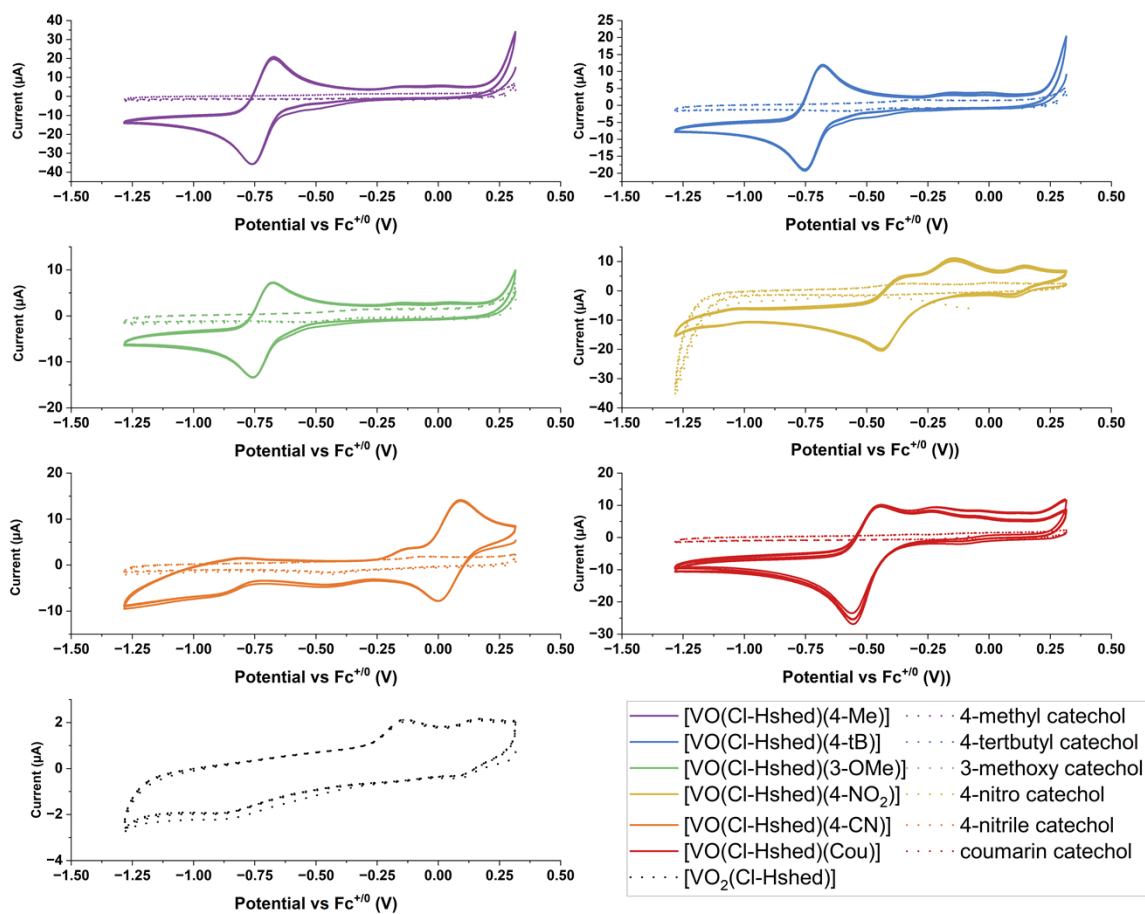

**Figure SI 4.b.1.** Cyclic voltammograms of tested compounds at 2 mM in CH<sub>3</sub>CN in the presence of 0.1 M TBAP as the supporting electrolyte. Scans were cycled at 100 mV s<sup>-1</sup> from approx. 0 V vs Fc<sup>+/0</sup> to -1.1 V and back 5 times using a glassy carbon working electrode. Figure includes the [VO<sub>2</sub>(Cl-Hshed)] precursor at 2mM while the free catechol ligands were tested at 5mM.

### c. Positive Cyclic Voltammograms of [VO(Cl-Hshed)(R)] tested

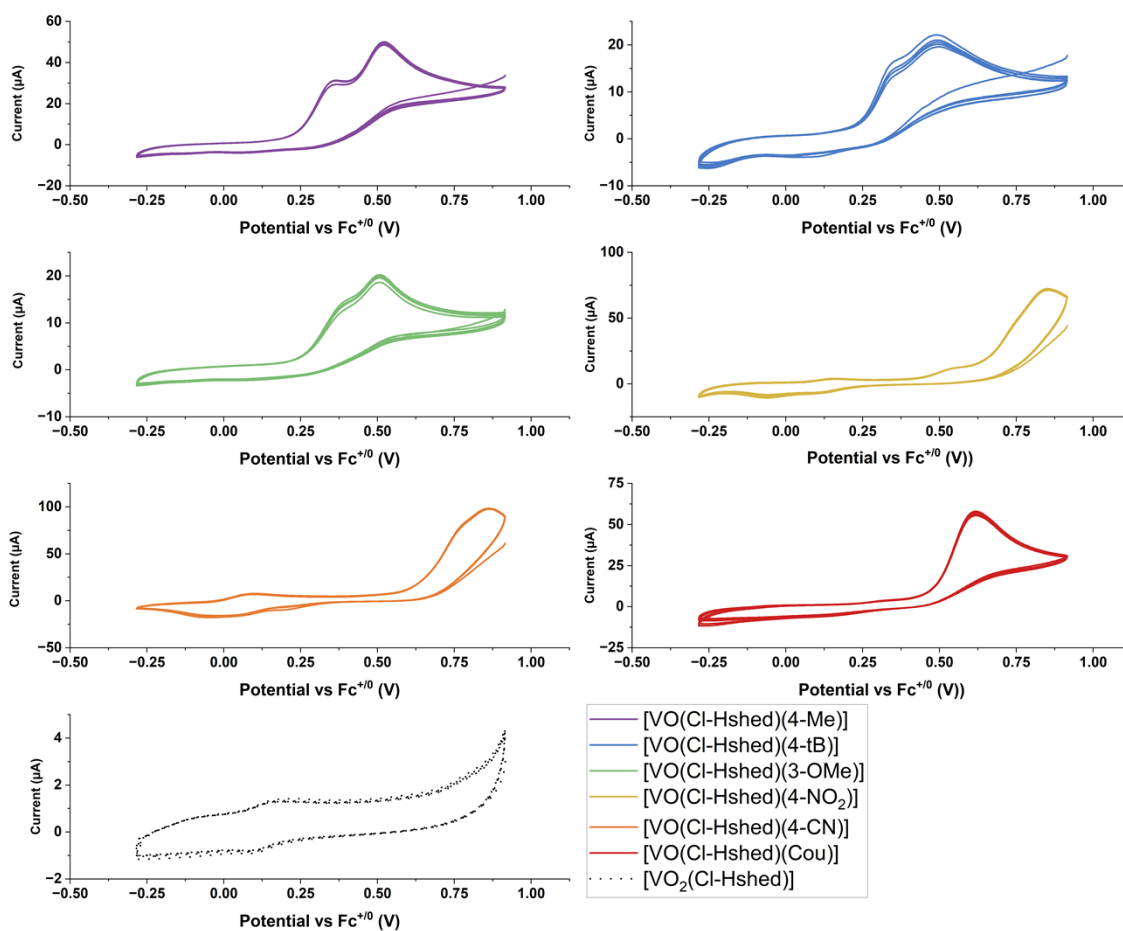

**Figure SI 4.c.1.** Cyclic voltammograms of tested compounds at 2 mM in CH<sub>3</sub>CN in the presence of 0.1 M TBAP as the supporting electrolyte. Scans were cycled at 100 mV s<sup>-1</sup> from approx. 1 V vs Fc<sup>+/0</sup> to -0.25 V and back 5 times using a glassy carbon working electrode. Figure includes the [VO<sub>2</sub>(Cl-Hshed)] precursor at 2mM.

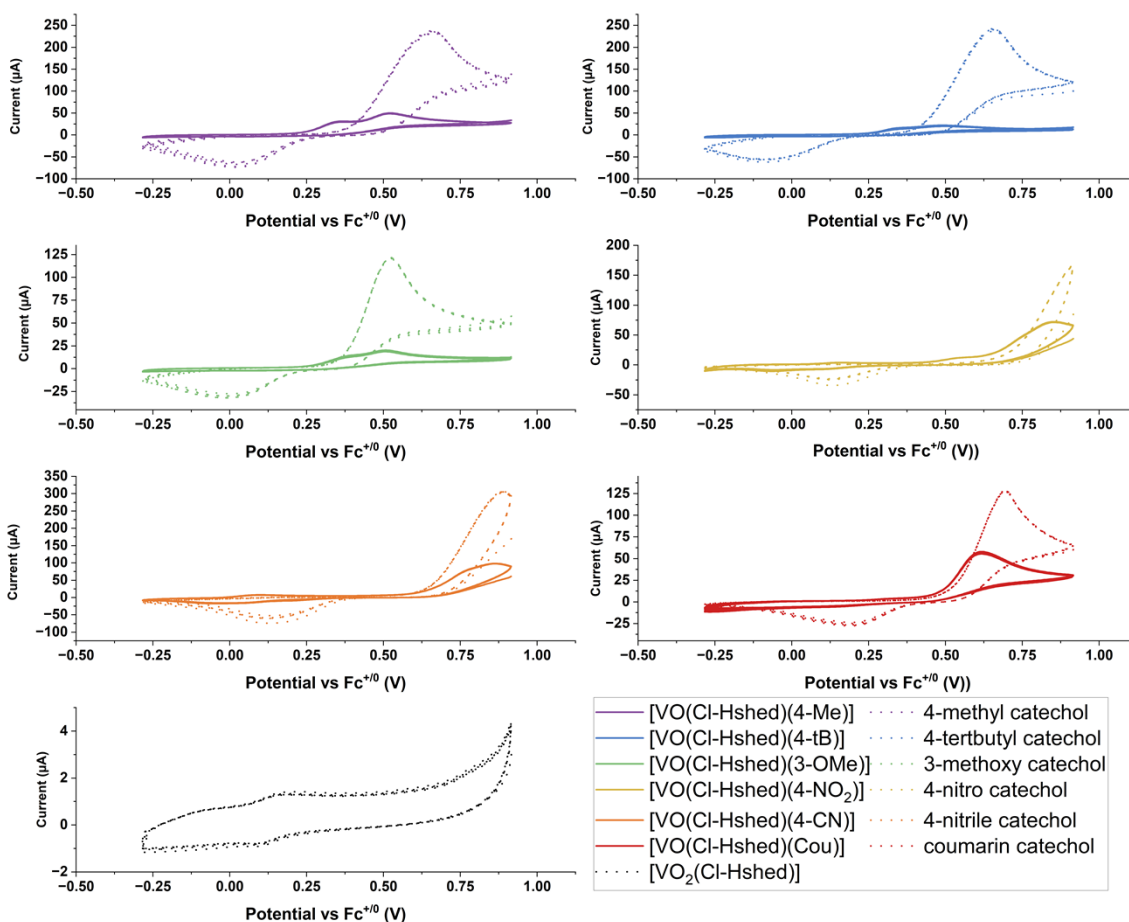

**Figure SI 4.c.2.** Cyclic voltammograms of tested compounds at 2 mM in CH<sub>3</sub>CN in the presence of 0.1 M TBAP as the supporting electrolyte. Scans were cycled at 100 mV s<sup>-1</sup> from approx. 1 V vs Fc<sup>+/0</sup> to -0.25 V and back 5 times using a glassy carbon working electrode. Figure includes the [VO<sub>2</sub>(Cl-Hshed)] precursor at 2mM while the free catechol ligands were tested at 5mM.

d. Comparative Graphs of [VO(Cl-Hshed)(R)] Stability and half wave potentials

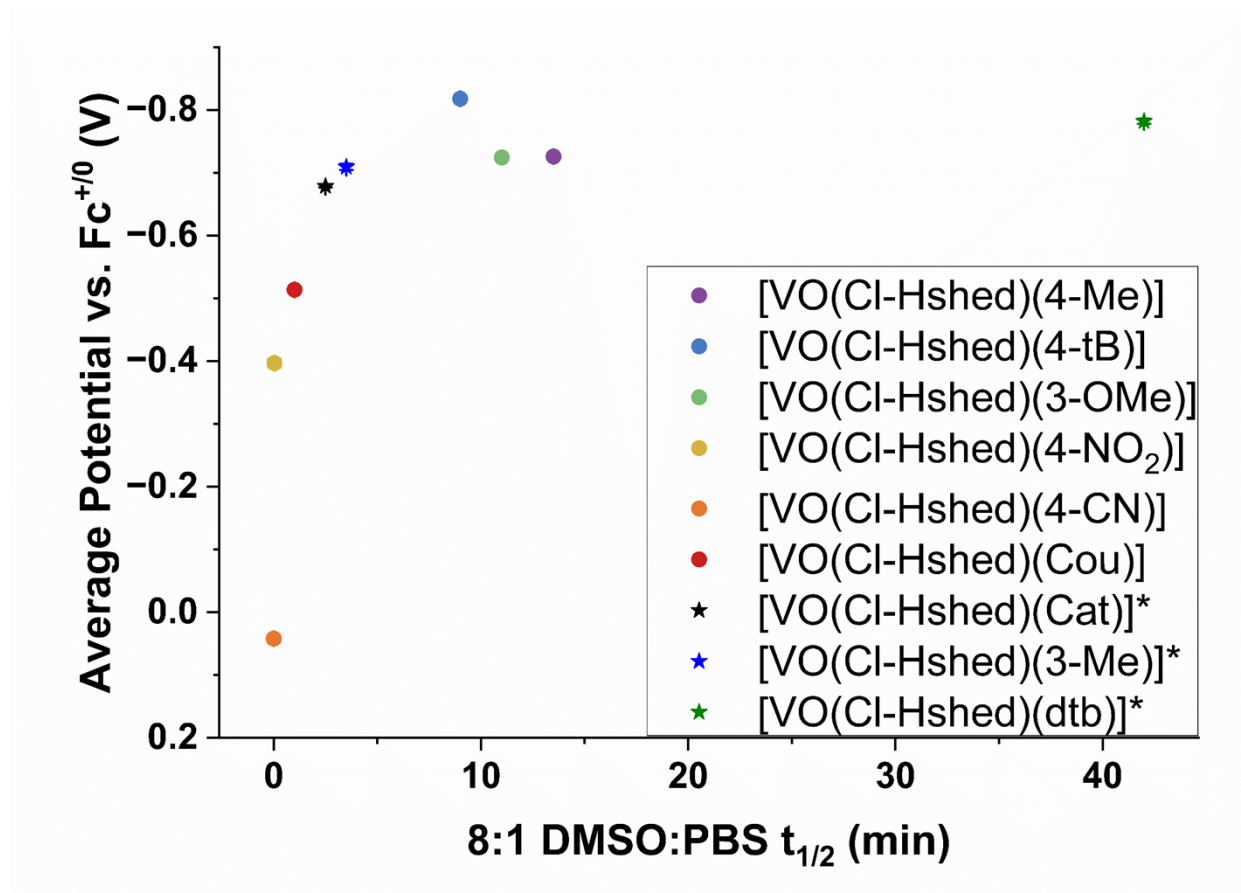

**Figure SI 4.d.1.** Half wave potentials of tested compounds at 2 mM in CH<sub>3</sub>CN in the presence of 0.1 M TBAP as the supporting electrolyte vs the half life of the compounds in an 8:1 DMSO:PBS mix. In general, there is a trend of more compound with more negative half wave potentials being more stable when exposed to water.

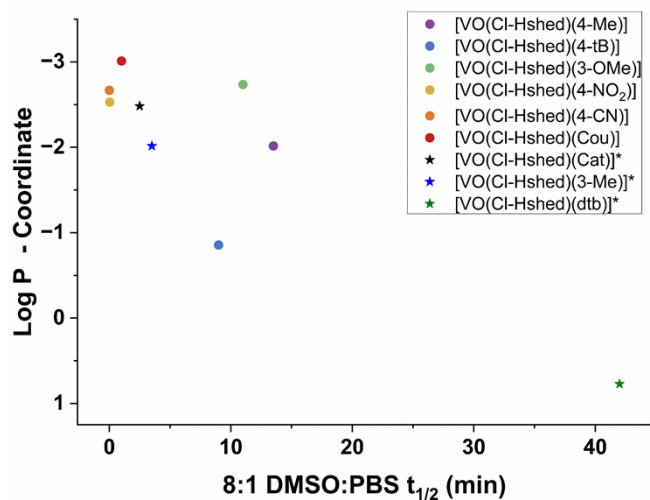

**Figure SI 4.d.2.** Computed log P values of tested compounds vs the half-life of the compounds in an 8:1 DMSO:PBS mix. There is no visible correlation between the two, other than the more water-soluble compounds seem to be less stable.

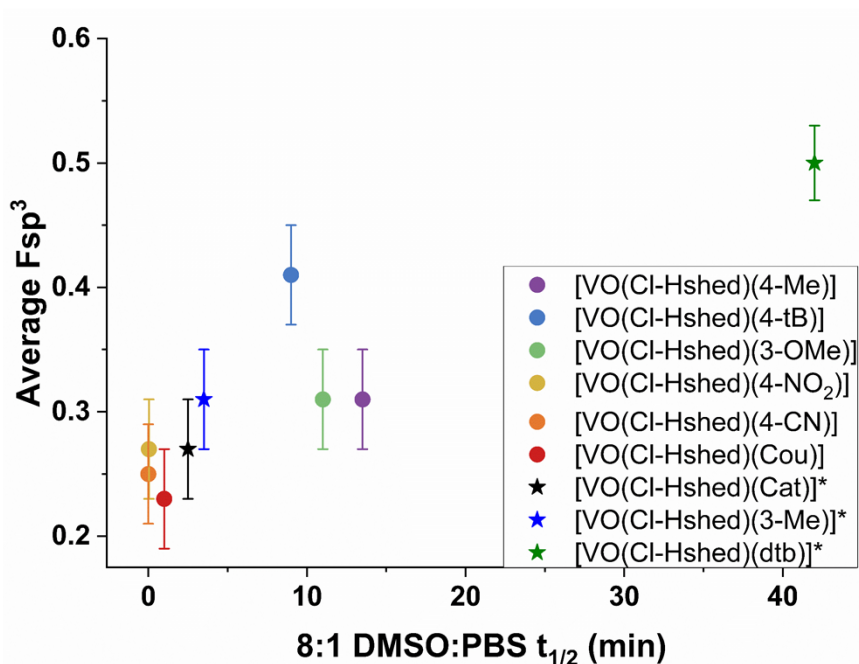

**Figure SI 4.d.3.** Average  $F_{sp^3}$ , the fraction of  $sp^3$  hybridized carbons in the molecule divided by total amount of carbon vs the half-life of the compounds in an 8:1 DMSO:PBS mix. In general, when there is more  $sp^3$  hybridized carbons on the molecule, it tends to degrade less when exposed to aqueous conditions.



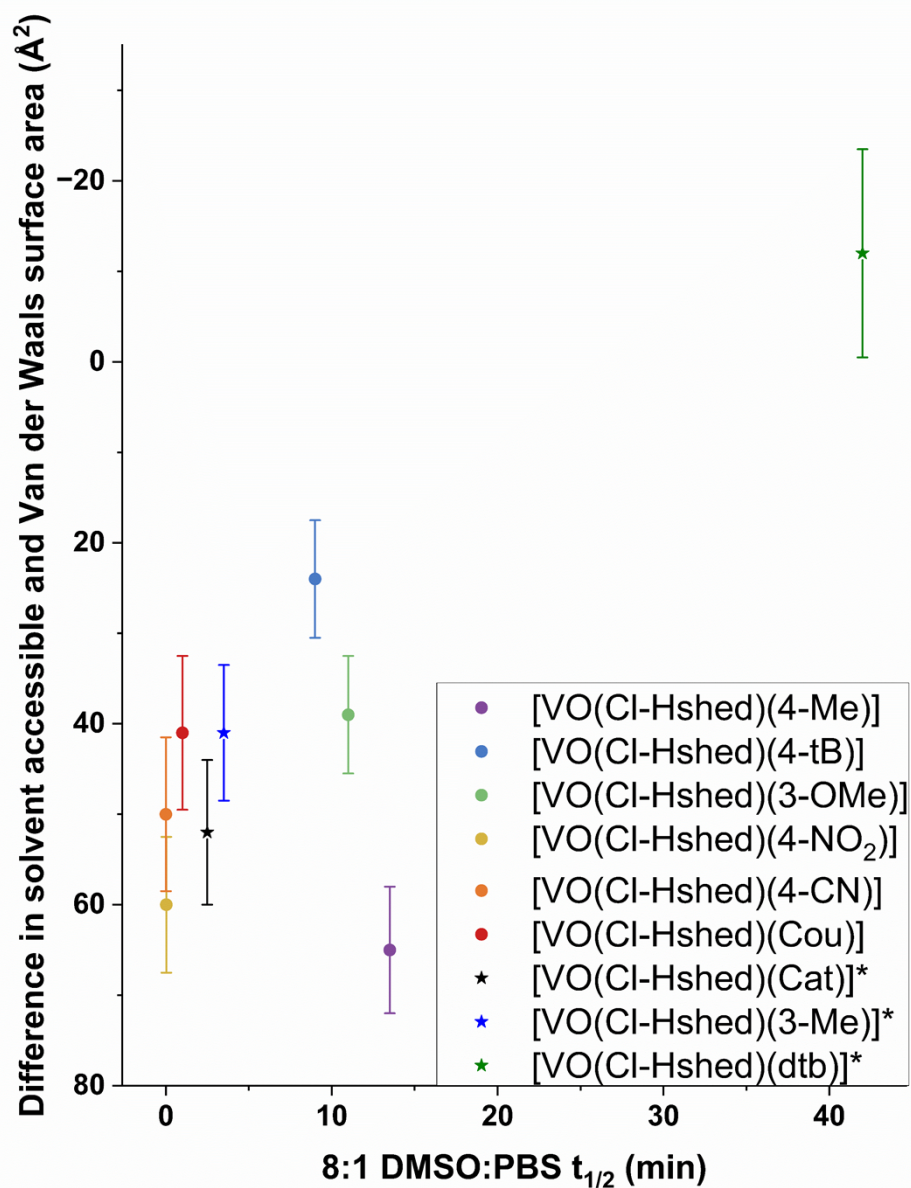

**Figure SI 4.d.4.** The difference in the solvent accessible surface area and the Van der Waals surface areas computed via Chemicalize vs the half-life of the compounds in an 8:1 DMSO:PBS mix. It is interesting to note that the most stable compound in this series is the only one with a larger Van der Waals surface area than a solvent accessible surface area. Future designed compounds should be computed for this property along with identifying stability before cell studies should be done.

## 5. Biological Data of Vanadium Schiff Base Catecholates

### a. Concentration Dependencies of Cell Viability

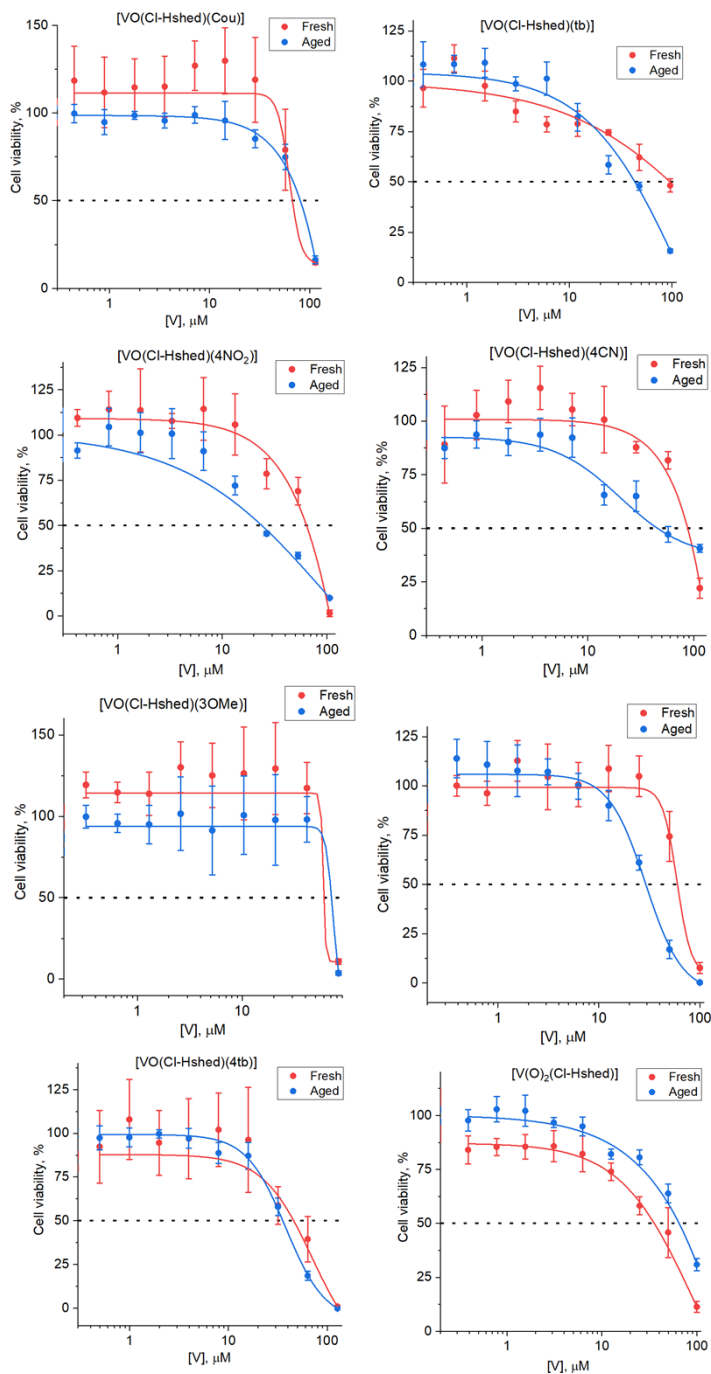

**Figure SI 5.a.** Typical concentration dependencies of T98g cell viabilities after 72 h treatments with fresh or aged (24 h) solutions of V(V)-Cl-Hshed complexes. Points are the experimental values (mean values and standard deviations of six replicate wells), and curves are sigmoidal fits of the experimental data.

## 6. Calculated Properties of compounds

### a. Computed Physical Properties of the Catechol Ligands

| Parameter                                         | cat*   | 3-Me*  | dtb*   | 4-Me   | 4-tB   | 3-OMe  | 4-NO <sub>2</sub> | 4-CN   | Cou    |
|---------------------------------------------------|--------|--------|--------|--------|--------|--------|-------------------|--------|--------|
| Fsp <sup>3</sup>                                  | 0      | 0.14   | 0.57   | 0.14   | 0.4    | 0.14   | 0                 | 0      | 0      |
| Polarizability (Å <sup>3</sup> )                  | 11.54  | 13.3   | 26.12  | 13.3   | 18.82  | 14.08  | 13.54             | 13.39  | 16.89  |
| Molar refractivity (cm <sup>3</sup> /mol)         | 30.02  | 35.06  | 67.35  | 35.06  | 48.69  | 36.48  | 37.34             | 35.74  | 45.51  |
| Strongest acidic pKa                              | 9.34   | 9.59   | 9.69   | 9.55   | 9.47   | 9.56   | 7.17              | 7.85   | 7.91   |
| Secondary pKa                                     | 12.79  | 13.04  | 13.39  | 13.01  | 12.91  | 13.13  | 11.18             | 11.4   | 12.27  |
| Log P                                             | 1.366  | 1.88   | 4.456  | 1.88   | 2.911  | 1.208  | 1.306             | 1.222  | 1.176  |
| HLB                                               | 9.689  | 8.928  | 5.281  | 8.928  | 7.126  | 11.738 | 12.718            | 10.449 | 11.699 |
| Intrinsic solubility (mg/mL)                      | -0.52  | -0.832 | -3.69  | -1.06  | -2.244 | -0.59  | -1.003            | -0.839 | -1.801 |
| Van der Waals volume (Å <sup>3</sup> )            | 99.01  | 115.85 | 236.12 | 115.78 | 167.41 | 125.09 | 121.01            | 115.56 | 143.05 |
| Van der Waals surface area (Å <sup>2</sup> )      | 158.06 | 189.84 | 412.86 | 190.09 | 285.83 | 205.83 | 198.73            | 175.12 | 208.24 |
| Solvent accessible surface area (Å <sup>2</sup> ) | 256.64 | 289.73 | 443.36 | 296.51 | 348.51 | 313.49 | 301.21            | 267.09 | 293.37 |
| Topological polar surface area (Å <sup>2</sup> )  | 40.46  | 40.46  | 40.46  | 40.46  | 40.46  | 49.69  | 86.28             | 64.25  | 66.76  |
| Minimum projection area (Å <sup>2</sup> )         | 22.52  | 25.38  | 43.04  | 22.96  | 33.23  | 27.64  | 24.44             | 24.05  | 24.11  |
| Maximum projection area (Å <sup>2</sup> )         | 38.17  | 43.79  | 69.4   | 43.92  | 54.38  | 46.15  | 43.63             | 44.41  | 55.21  |
| Minimum projection radius (Å)                     | 3.58   | 3.83   | 4.69   | 3.56   | 3.88   | 3.73   | 3.54              | 3.87   | 3.61   |
| Maximum projection radius (Å)                     | 3.95   | 4.21   | 5.61   | 4.44   | 5.17   | 4.67   | 4.61              | 4.85   | 5.31   |

**Table SI 6.a.** Computed physical properties of the catechol ligands.

**b. Computed physical properties of the complex where a nitrogen is coordinately bonded to the vanadium center.**

| Coordinate Properties                             | cat*   | 3-Me*  | dtb*   | 4-Me   | 4-tB   | 3-OMe  | 4-NO <sub>2</sub> | 4-CN   | Cou    |
|---------------------------------------------------|--------|--------|--------|--------|--------|--------|-------------------|--------|--------|
| Fsp <sup>3</sup>                                  | 0.24   | 0.28   | 0.48   | 0.28   | 0.38   | 0.28   | 0.24              | 0.22   | 0.2    |
| Polarizability (Å <sup>3</sup> )                  | 38.62  | 40.37  | 53.09  | 40.37  | 45.84  | 41.18  | 40.65             | 40.48  | 44     |
| Molar refractivity (cm <sup>3</sup> /mol)         | 105.85 | 110.89 | 143.18 | 110.89 | 124.51 | 112.31 | 113.17            | 111.57 | 121.34 |
| Strongest acidic pKa                              | 14.64  | 14.64  | 14.64  | 14.64  | 14.64  | 14.64  | 14.64             | 14.64  | 14.64  |
| Log P                                             | -2.482 | -2.015 | 0.772  | -2.015 | -0.855 | -2.735 | -2.529            | -2.667 | -3.011 |
| HLB                                               | 14.439 | 13.98  | 11.026 | 13.98  | 12.665 | 15.345 | 16.183            | 14.607 | 15.718 |
| Intrinsic solubility (mg/mL)                      | -4.447 | -4.691 | -7.078 | -4.919 | -5.901 | -4.372 | -4.714            | -4.646 | -5.401 |
| Van der Waals volume (Å <sup>3</sup> )            | 328.68 | 345.71 | 465.91 | 345.54 | 397.41 | 354.84 | 350.88            | 345.32 | 372.88 |
| Van der Waals surface area (Å <sup>2</sup> )      | 515.35 | 546.68 | 769.3  | 547.62 | 642.41 | 566.03 | 556.44            | 532.44 | 566.72 |
| Solvent accessible surface area (Å <sup>2</sup> ) | 578.76 | 592.82 | 758.91 | 623.03 | 674.05 | 614.33 | 626.71            | 594.44 | 610.8  |
| Topological polar surface area (Å <sup>2</sup> )  | 88.64  | 88.64  | 88.64  | 88.64  | 88.64  | 97.87  | 134.46            | 112.43 | 114.94 |
| Minimum projection area (Å <sup>2</sup> )         | 60.41  | 61.51  | 77.74  | 64.07  | 69.99  | 62.44  | 65.66             | 66.05  | 68.82  |
| Maximum projection area (Å <sup>2</sup> )         | 94.01  | 98.25  | 126.99 | 99.01  | 110.07 | 101.15 | 99.63             | 100.14 | 110.57 |
| Minimum projection radius (Å)                     | 5.68   | 5.96   | 6.55   | 5.7    | 6      | 5.77   | 5.72              | 6.55   | 6.61   |
| Maximum projection radius (Å)                     | 7.29   | 7.33   | 8.1    | 7.82   | 8.57   | 7.55   | 7.95              | 7.7    | 8.7    |

**Table SI 6.b.** Computed physical properties of the complex where a nitrogen is coordinately bonded to the vanadium center.

**c. Computed physical properties of the complex where a nitrogen is covalently bonded to the vanadium center, but a hydrogen was lost from the nitrogen.**

| Covalent - Properties                             | cat*   | 3-Me*  | dtb*   | 4-Me   | 4-tB   | 3-OMe  | 4-NO <sub>2</sub> | 4-CN   | Cou    |
|---------------------------------------------------|--------|--------|--------|--------|--------|--------|-------------------|--------|--------|
| Fsp <sup>3</sup>                                  | 0.29   | 0.33   | 0.52   | 0.33   | 0.43   | 0.33   | 0.29              | 0.28   | 0.25   |
| Polarizability (Å <sup>3</sup> )                  | 38.36  | 40.11  | 52.82  | 40.11  | 45.58  | 40.92  | 40.4              | 40.22  | 43.74  |
| Molar refractivity (cm <sup>3</sup> /mol)         | 91.33  | 96.37  | 128.66 | 96.37  | 109.99 | 97.79  | 98.65             | 97.05  | 106.82 |
| Strongest acidic pKa                              | 15.61  | 15.61  | 15.61  | 15.61  | 15.61  | 15.61  | 15.61             | 15.61  | 15.61  |
| Log P                                             | 2.126  | 2.593  | 5.38   | 2.593  | 3.753  | 1.873  | 2.079             | 1.941  | 1.597  |
| HLB                                               | 14.439 | 13.98  | 11.026 | 13.98  | 12.665 | 15.345 | 16.183            | 14.607 | 15.718 |
| Intrinsic solubility (mg/mL)                      | -4.811 | -5.055 | -7.442 | -5.284 | -6.265 | -4.736 | -5.078            | -5.01  | -5.765 |
| Van der Waals volume (Å <sup>3</sup> )            | 331.47 | 348.53 | 469.17 | 348.61 | 400.46 | 357.66 | 353.79            | 348.48 | 375.86 |
| Van der Waals surface area (Å <sup>2</sup> )      | 531.13 | 562.62 | 786.32 | 563.65 | 659.69 | 579.39 | 572.24            | 548.53 | 582.02 |
| Solvent accessible surface area (Å <sup>2</sup> ) | 571.22 | 598.96 | 773.87 | 619.22 | 674.96 | 610.33 | 621.51            | 586.11 | 619.23 |
| Topological polar surface area (Å <sup>2</sup> )  | 71.47  | 71.47  | 71.47  | 71.47  | 71.47  | 80.7   | 117.29            | 95.26  | 97.77  |
| Minimum projection area (Å <sup>2</sup> )         | 55.7   | 59.87  | 78.18  | 57.58  | 63.22  | 59.63  | 57.72             | 57.54  | 58.24  |
| Maximum projection area (Å <sup>2</sup> )         | 102.91 | 104.09 | 130.78 | 107.93 | 118.42 | 104.57 | 109.91            | 107.59 | 115.76 |
| Minimum projection radius (Å)                     | 4.95   | 4.94   | 5.88   | 5.88   | 5.44   | 5.09   | 5.88              | 5.02   | 5.89   |
| Maximum projection radius (Å)                     | 7.85   | 7.78   | 9.01   | 8.02   | 8.99   | 7.76   | 8.16              | 8.57   | 8.75   |

**Table SI 4.c.** Computed physical properties of the complex where a nitrogen is covalently bonded to the vanadium center, but a hydrogen was lost from the nitrogen.

**d. Average computed physical properties of the vanadium complex using both coordinate and covalent bonding methods.**

| Average                                           | cat*        | 3-Me*       | dtb*        | 4-Me        | 4-tB        | 3-OMe       | 4-NO <sub>2</sub> | 4-CN        | Cou         |
|---------------------------------------------------|-------------|-------------|-------------|-------------|-------------|-------------|-------------------|-------------|-------------|
| Fsp <sup>3</sup>                                  | 0.27 ± 0.04 | 0.31 ± 0.04 | 0.50 ± 0.03 | 0.31 ± 0.04 | 0.41 ± 0.04 | 0.31 ± 0.04 | 0.27 ± 0.04       | 0.25 ± 0.04 | 0.23 ± 0.04 |
| Polarizability (Å <sup>3</sup> )                  | 38.5 ± 0.2  | 40.2 ± 0.2  | 53.0 ± 0.2  | 40.2 ± 0.2  | 45.7 ± 0.2  | 41.1 ± 0.2  | 40.5 ± 0.2        | 40.4 ± 0.2  | 43.9 ± 0.2  |
| Molar refractivity (cm <sup>3</sup> /mol)         | 99 ± 10     | 104 ± 10    | 136 ± 10    | 104 ± 10    | 117 ± 10    | 105 ± 10    | 106 ± 10          | 104 ± 10    | 114 ± 10    |
| Strongest acidic pKa                              | 15.1 ± 0.7  | 15.1 ± 0.7  | 15.1 ± 0.7  | 15.1 ± 0.7  | 15.1 ± 0.7  | 15.1 ± 0.7  | 15.1 ± 0.7        | 15.1 ± 0.7  | 15.1 ± 0.7  |
| HLB                                               | 14.44       | 13.98       | 11.03       | 13.98       | 12.67       | 15.35       | 16.18             | 14.61       | 15.72       |
| Intrinsic solubility (mg/mL)                      | -4.6 ± 0.3  | -4.9 ± 0.3  | -7.3 ± 0.3  | -5.1 ± 0.3  | -6.1 ± 0.3  | -4.6 ± 0.3  | -4.9 ± 0.3        | -4.8 ± 0.3  | -5.6 ± 0.3  |
| Van der Waals volume (Å <sup>3</sup> )            | 330 ± 2     | 347 ± 2     | 468 ± 2     | 347 ± 2     | 399 ± 2     | 356 ± 2     | 352 ± 2           | 347 ± 2     | 374 ± 2     |
| Van der Waals surface area (Å <sup>2</sup> )      | 523 ± 11    | 555 ± 11    | 778 ± 12    | 556 ± 11    | 651 ± 12    | 573 ± 10    | 564 ± 11          | 540 ± 11    | 574 ± 11    |
| Solvent accessible surface area (Å <sup>2</sup> ) | 575 ± 5     | 596 ± 4     | 766 ± 11    | 621 ± 3     | 675 ± 1     | 612 ± 3     | 624 ± 4           | 590 ± 6     | 615 ± 6     |
| Topological polar surface area (Å <sup>2</sup> )  | 80 ± 12     | 80 ± 12     | 80 ± 12     | 80 ± 12     | 80 ± 12     | 89 ± 12     | 126 ± 12          | 104 ± 12    | 106 ± 12    |
| Minimum projection area (Å <sup>2</sup> )         | 58 ± 3      | 61 ± 1      | 78.0 ± 0.3  | 61 ± 5      | 67 ± 5      | 61 ± 2      | 62 ± 6            | 62 ± 6      | 64 ± 7      |
| Maximum projection area (Å <sup>2</sup> )         | 98 ± 6      | 101 ± 4     | 129 ± 3     | 103 ± 6     | 114 ± 6     | 103 ± 2     | 105 ± 7           | 104 ± 5     | 113 ± 4     |
| Minimum projection radius (Å)                     | 5.3 ± 0.5   | 5.5 ± 0.7   | 6.2 ± 0.5   | 5.8 ± 0.1   | 5.7 ± 0.4   | 5.4 ± 0.5   | 5.0 ± 0.1         | 6 ± 1       | 6.3 ± 0.5   |
| Maximum projection radius (Å)                     | 7.6 ± 0.4   | 7.6 ± 0.3   | 8.6 ± 0.6   | 7.9 ± 0.1   | 8.8 ± 0.3   | 7.7 ± 0.2   | 8.1 ± 0.2         | 8.1 ± 0.6   | 8.7 ± 0.1   |

**Table SI 4.d.** Average computed physical properties of the vanadium complex using both coordinate and covalent bonding methods.
